# Supplementary material
Source: MDPI journal article supplement (https://www.mdpi.com/2304-6740/7/2/24)

# checkCIF/PLATON report

You have not supplied any structure factors. As a result the full set of tests cannot be run.

THIS REPORT IS FOR GUIDANCE ONLY. IF USED AS PART OF A REVIEW PROCEDURE FOR PUBLICATION, IT SHOULD NOT REPLACE THE EXPERTISE OF AN EXPERIENCED CRYSTALLOGRAPHIC REFEREE.

No syntax errors found.      CIF dictionary      Interpreting this report

## Datablock: MT119B

---

|                        |                                            |                                |
|------------------------|--------------------------------------------|--------------------------------|
| Bond precision:        | C-C = 0.0056 Å                             | Wavelength=0.71073             |
| Cell:                  | a=29.161(3)                                | b=30.102(3)      c=31.045(3)   |
|                        | alpha=90                                   | beta=102.323(2)      gamma=90  |
| Temperature:           | 100 K                                      |                                |
|                        | Calculated                                 | Reported                       |
| Volume                 | 26624(5)                                   | 26624(5)                       |
| Space group            | C 2/c                                      | C 2/c                          |
| Hall group             | -C 2yc                                     | -C 2yc                         |
| Moiety formula         | C144 H204 B6 I6 N36 S18<br>Zn6 [+ solvent] | C144 H204 B6 I6 N36 S18<br>Zn6 |
| Sum formula            | C144 H204 B6 I6 N36 S18<br>Zn6 [+ solvent] | C144 H204 B6 I6 N36 S18<br>Zn6 |
| Mr                     | 4235.13                                    | 4234.98                        |
| Dx, g cm <sup>-3</sup> | 1.057                                      | 1.057                          |
| Z                      | 4                                          | 4                              |
| Mu (mm <sup>-1</sup> ) | 1.407                                      | 1.407                          |
| F000                   | 8544.0                                     | 8544.0                         |
| F000'                  | 8550.01                                    |                                |
| h,k,lmax               | 35,37,38                                   | 35,37,38                       |
| Nref                   | 26176                                      | 26154                          |
| Tmin,Tmax              | 0.635,0.713                                | 0.735,1.000                    |
| Tmin'                  | 0.622                                      |                                |

Correction method= # Reported T Limits: Tmin=0.735 Tmax=1.000  
AbsCorr = MULTI-SCAN

Data completeness= 0.999      Theta(max)= 26.000

R(reflections)= 0.0399( 19711)      wR2(reflections)= 0.1151( 26154)

S = 1.134      Npar= 1018

---

The following ALERTS were generated. Each ALERT has the format

**test-name\_ALERT\_alert-type\_alert-level.**

Click on the hyperlinks for more details of the test.

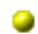

#### Alert level C

|                   |             |           |         |                     |              |     |              |
|-------------------|-------------|-----------|---------|---------------------|--------------|-----|--------------|
| PLAT220_ALERT_2_C | Non-Solvent | Resd 1    | C       | Ueq(max)/Ueq(min)   | Range        | 3.8 | Ratio        |
| PLAT222_ALERT_3_C | Non-Solv.   | Resd 1    | H       | Uiso(max)/Uiso(min) | Range        | 4.5 | Ratio        |
| PLAT230_ALERT_2_C | Hirshfeld   | Test Diff | for     | C90                 | --C99        | .   | 5.5 s.u.     |
| PLAT241_ALERT_2_C | High        | 'MainMol' | Ueq     | as Compared to      | Neighbors of | C65 | Check        |
| PLAT245_ALERT_2_C | U(iso)      | H3        | Smaller | than U(eq)          | B3           | by  | 0.018 Ang**2 |
| PLAT245_ALERT_2_C | U(iso)      | H65       | Smaller | than U(eq)          | C65          | by  | 0.011 Ang**2 |

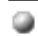

#### Alert level G

|                   |                             |                       |    |        |
|-------------------|-----------------------------|-----------------------|----|--------|
| PLAT002_ALERT_2_G | Number of Distance or Angle | Restraints on AtSite  | 22 | Note   |
| PLAT171_ALERT_4_G | The CIF-Embedded .res File  | Contains EADP Records | 8  | Report |

**Author Response: Two tert. butyl groups (bonded to C16, C36) were disordered over two orientations and refined with site occupation factors of 0.815(5) and 0.839(4), resp., for the more prominent occupied orientations. The same anisotropic displacement parameters were used for equivalent C atoms of these disordered tert. butyl groups (2\*4 EADP instructions of SHELXL) and the C-C distances were restrained to 1.53A (DFIX of SHELXL), The other non-hydrogen atoms of the complex were refined with anisotropic displacement parameters without any constraints.**

|                   |                            |                       |   |        |
|-------------------|----------------------------|-----------------------|---|--------|
| PLAT172_ALERT_4_G | The CIF-Embedded .res File | Contains DFIX Records | 1 | Report |
|-------------------|----------------------------|-----------------------|---|--------|

**Author Response: see above.**

|                   |                            |                       |   |        |
|-------------------|----------------------------|-----------------------|---|--------|
| PLAT176_ALERT_4_G | The CIF-Embedded .res File | Contains SADI Records | 1 | Report |
|-------------------|----------------------------|-----------------------|---|--------|

**Author Response: The H atoms bonded to the B atoms could be clearly identified in a difference Fourier map and were refined with a common isotropic displacement parameter. The B-H distances were restrained to have the same lengths (SADI instruction of SHELXL) but these H atoms were refined without any further positional constraints.**

|                   |              |                    |                |              |   |     |      |
|-------------------|--------------|--------------------|----------------|--------------|---|-----|------|
| PLAT232_ALERT_2_G | Hirshfeld    | Test Diff (M-X)    | I1             | --Zn1        | . | 6.0 | s.u. |
| PLAT301_ALERT_3_G | Main Residue | Disorder           | .....(Resd 1 ) |              |   | 7%  | Note |
| PLAT606_ALERT_4_G | VERY LARGE   | Solvent Accessible | VOID(S)        | in Structure |   | !   | Info |

**Author Response:** Besides the described hexameric complex there are large regions containing disordered n-hexane molecules. Since it was not possible to describe the refined peaks of residual electron density as partially occupied individual solvent molecules, the diffuse electron density in these regions was calculated by the SQUEEZE routine of the PLATON program (A. L. Spek, 2015). The solvent contribution to the calculated structure factors for each reflection hkl is included in the FAB file. The SQUEEZE routine computed a very large void volume of 9982 Å<sup>3</sup> (37.5% of the unit cell) with an electron count of approx. 3586 per unit cell (consistent with 72 n-hexane molecules with 50 electrons each). Further details are given in \_refine\_special\_details.

```
PLAT794_ALERT_5_G Tentative Bond Valency for Zn1      (II)      .      2.02 Info
PLAT794_ALERT_5_G Tentative Bond Valency for Zn2      (II)      .      2.03 Info
PLAT794_ALERT_5_G Tentative Bond Valency for Zn3      (II)      .      2.06 Info
PLAT860_ALERT_3_G Number of Least-Squares Restraints .....      15 Note
PLAT869_ALERT_4_G ALERTS Related to the Use of SQUEEZE Suppressed      ! Info
PLAT933_ALERT_2_G Number of OMIT Records in Embedded .res File ...      11 Note
```

---

```
0 ALERT level A = Most likely a serious problem - resolve or explain
0 ALERT level B = A potentially serious problem, consider carefully
6 ALERT level C = Check. Ensure it is not caused by an omission or oversight
13 ALERT level G = General information/check it is not something unexpected

0 ALERT type 1 CIF construction/syntax error, inconsistent or missing data
8 ALERT type 2 Indicator that the structure model may be wrong or deficient
3 ALERT type 3 Indicator that the structure quality may be low
5 ALERT type 4 Improvement, methodology, query or suggestion
3 ALERT type 5 Informative message, check
```

---

## Datablock: MR38

---

```
Bond precision:  C-C = 0.0016 Å      Wavelength=0.71073

Cell:            a=10.2147(3)      b=8.6489(2)      c=27.2498(8)
                  alpha=90         beta=96.6196(13)   gamma=90
Temperature:     100 K
```

|                | Calculated           | Reported             |
|----------------|----------------------|----------------------|
| Volume         | 2391.36(11)          | 2391.36(11)          |
| Space group    | P 21/c               | P 21/c               |
| Hall group     | -P 2ybc              | -P 2ybc              |
| Moiety formula | C18 H28 Br2 N4 S2 Zn | C18 H28 Br2 N4 S2 Zn |
| Sum formula    | C18 H28 Br2 N4 S2 Zn | C18 H28 Br2 N4 S2 Zn |
| Mr             | 589.75               | 589.75               |
| Dx,g cm-3      | 1.638                | 1.638                |
| Z              | 4                    | 4                    |
| Mu (mm-1)      | 4.554                | 4.554                |
| F000           | 1184.0               | 1184.0               |
| F000'          | 1184.18              |                      |
| h,k,lmax       | 16,13,43             | 16,13,43             |
| Nref           | 10522                | 10517                |
| Tmin,Tmax      | 0.278,0.505          | 0.736,1.000          |
| Tmin'          | 0.234                |                      |

Correction method= # Reported T Limits: Tmin=0.736 Tmax=1.000  
AbsCorr = MULTI-SCAN

Data completeness= 1.000                      Theta(max)= 35.000

R(reflections)= 0.0224( 9146)              wR2(reflections)= 0.0500( 10517)

S = 1.046                                      Npar= 268

The following ALERTS were generated. Each ALERT has the format

**test-name\_ALERT\_alert-type\_alert-level.**

Click on the hyperlinks for more details of the test.

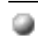

#### Alert level G

|                                                                    |          |
|--------------------------------------------------------------------|----------|
| PLAT002_ALERT_2_G Number of Distance or Angle Restraints on AtSite | 4 Note   |
| PLAT172_ALERT_4_G The CIF-Embedded .res File Contains DFIX Records | 1 Report |

**Author Response: The positions of the H atoms H12 and H22 were taken from a difference Fourier map, the N-H distances were fixed to 0.88Å, and these H atoms were refined without any constraints to the bond angles (DFIX of SHELXL).**

|                                                                    |           |
|--------------------------------------------------------------------|-----------|
| PLAT380_ALERT_4_G Incorrectly? Oriented X(sp2)-Methyl Moiety ..... | C21 Check |
| PLAT794_ALERT_5_G Tentative Bond Valency for Zn1 (II) .....        | 1.96 Info |
| PLAT860_ALERT_3_G Number of Least-Squares Restraints .....         | 2 Note    |

0 **ALERT level A** = Most likely a serious problem - resolve or explain  
0 **ALERT level B** = A potentially serious problem, consider carefully  
0 **ALERT level C** = Check. Ensure it is not caused by an omission or oversight  
5 **ALERT level G** = General information/check it is not something unexpected

0 ALERT type 1 CIF construction/syntax error, inconsistent or missing data

1 ALERT type 2 Indicator that the structure model may be wrong or deficient  
1 ALERT type 3 Indicator that the structure quality may be low  
2 ALERT type 4 Improvement, methodology, query or suggestion  
1 ALERT type 5 Informative message, check

---

## Datablock: MR55B

---

Bond precision: C-C = 0.0143 Å                      Wavelength=0.71073

Cell:                      a=16.6456(19)              b=16.9851(19)              c=34.357(4)  
                            alpha=90                      beta=90                      gamma=90

Temperature:              100 K

|                        | Calculated                           | Reported              |
|------------------------|--------------------------------------|-----------------------|
| Volume                 | 9713.7(19)                           | 9713.6(19)            |
| Space group            | P 21 21 21                           | P 21 21 21            |
| Hall group             | P 2ac 2ab                            | P 2ac 2ab             |
| Moiety formula         | C36 H54 B Br N8 S4 Zn [+<br>solvent] | C36 H54 B Br N8 S4 Zn |
| Sum formula            | C36 H54 B Br N8 S4 Zn [+<br>solvent] | C36 H54 B Br N8 S4 Zn |
| Mr                     | 883.21                               | 883.20                |
| Dx, g cm <sup>-3</sup> | 1.208                                | 1.208                 |
| Z                      | 8                                    | 8                     |
| Mu (mm <sup>-1</sup> ) | 1.532                                | 1.532                 |
| F000                   | 3680.0                               | 3680.0                |
| F000'                  | 3684.68                              |                       |
| h,k,lmax               | 19,20,40                             | 19,20,40              |
| Nref                   | 17106[ 9331]                         | 16976                 |
| Tmin,Tmax              | 0.755,0.807                          | 0.790,1.000           |
| Tmin'                  | 0.740                                |                       |

Correction method= # Reported T Limits: Tmin=0.790 Tmax=1.000  
AbsCorr = MULTI-SCAN

Data completeness= 1.82/0.99                      Theta(max)= 25.000

R(reflections)= 0.0526( 11043)              wR2(reflections)= 0.1315( 16976)

S = 1.014                      Npar= 961

---

The following ALERTS were generated. Each ALERT has the format  
**test-name\_ALERT\_alert-type\_alert-level.**  
Click on the hyperlinks for more details of the test.

---

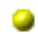

### Alert level C

PLAT220\_ALERT\_2\_C Non-Solvent Resd 1 C Ueq(max)/Ueq(min) Range 3.9 Ratio

|                   |                       |            |                                 |                     |       |         |        |
|-------------------|-----------------------|------------|---------------------------------|---------------------|-------|---------|--------|
| PLAT220_ALERT_2_C | Non-Solvent           | Resd 2     | C                               | Ueq(max)/Ueq(min)   | Range | 3.3     | Ratio  |
| PLAT222_ALERT_3_C | Non-Solv.             | Resd 1     | H                               | Uiso(max)/Uiso(min) | Range | 10.0    | Ratio  |
| PLAT222_ALERT_3_C | Non-Solv.             | Resd 2     | H                               | Uiso(max)/Uiso(min) | Range | 10.0    | Ratio  |
| PLAT234_ALERT_4_C | Large Hirshfeld       | Difference | C10                             | --C18               | .     | 0.17    | Ang.   |
| PLAT234_ALERT_4_C | Large Hirshfeld       | Difference | C30                             | --C36               | .     | 0.16    | Ang.   |
| PLAT234_ALERT_4_C | Large Hirshfeld       | Difference | C34                             | --C35               | .     | 0.16    | Ang.   |
| PLAT234_ALERT_4_C | Large Hirshfeld       | Difference | C35                             | --C36               | .     | 0.18    | Ang.   |
| PLAT234_ALERT_4_C | Large Hirshfeld       | Difference | C43                             | --C44               | .     | 0.18    | Ang.   |
| PLAT234_ALERT_4_C | Large Hirshfeld       | Difference | C45                             | --C46               | .     | 0.17    | Ang.   |
| PLAT234_ALERT_4_C | Large Hirshfeld       | Difference | N72                             | --C73               | .     | 0.16    | Ang.   |
| PLAT234_ALERT_4_C | Large Hirshfeld       | Difference | C50                             | --C59               | .     | 0.19    | Ang.   |
| PLAT234_ALERT_4_C | Large Hirshfeld       | Difference | C80                             | --C88               | .     | 0.16    | Ang.   |
| PLAT242_ALERT_2_C | Low                   | 'MainMol'  | Ueq as Compared to Neighbors of |                     |       | C40     | Check  |
| PLAT242_ALERT_2_C | Low                   | 'MainMol'  | Ueq as Compared to Neighbors of |                     |       | C50     | Check  |
| PLAT242_ALERT_2_C | Low                   | 'MainMol'  | Ueq as Compared to Neighbors of |                     |       | C60     | Check  |
| PLAT242_ALERT_2_C | Low                   | 'MainMol'  | Ueq as Compared to Neighbors of |                     |       | C70     | Check  |
| PLAT242_ALERT_2_C | Low                   | 'MainMol'  | Ueq as Compared to Neighbors of |                     |       | C80     | Check  |
| PLAT245_ALERT_2_C | U(iso)                | H1         | Smaller than U(eq)              | B1                  | by    | 0.030   | Ang**2 |
| PLAT245_ALERT_2_C | U(iso)                | H2         | Smaller than U(eq)              | B2                  | by    | 0.031   | Ang**2 |
| PLAT245_ALERT_2_C | U(iso)                | H571       | Smaller than U(eq)              | C57                 | by    | 0.011   | Ang**2 |
| PLAT245_ALERT_2_C | U(iso)                | H572       | Smaller than U(eq)              | C57                 | by    | 0.011   | Ang**2 |
| PLAT245_ALERT_2_C | U(iso)                | H573       | Smaller than U(eq)              | C57                 | by    | 0.011   | Ang**2 |
| PLAT341_ALERT_3_C | Low Bond Precision on | C-C Bonds  | .....                           |                     |       | 0.01428 | Ang.   |

### Alert level G

|                   |                                                  |       |        |
|-------------------|--------------------------------------------------|-------|--------|
| PLAT002_ALERT_2_G | Number of Distance or Angle Restraints on AtSite | 4     | Note   |
| PLAT033_ALERT_4_G | Flack x Value Deviates > 3.0 * sigma from Zero   | 0.078 | Note   |
| PLAT172_ALERT_4_G | The CIF-Embedded .res File Contains DFIX Records | 1     | Report |

**Author Response: The positions of the H atoms of the NH groups were taken from a difference Fourier map, the N-H distances were fixed to 0.88A, and these H atoms were refined with a common isotropic displacement parameter without any constraints to the bond angles (DFIX of SHELXL).**

|                   |                                                    |       |      |       |
|-------------------|----------------------------------------------------|-------|------|-------|
| PLAT380_ALERT_4_G | Incorrectly? Oriented X(sp2)-Methyl Moiety         | ..... | C71  | Check |
| PLAT606_ALERT_4_G | VERY LARGE Solvent Accessible VOID(S) in Structure |       | !    | Info  |
| PLAT794_ALERT_5_G | Tentative Bond Valency for Zn1                     | (II)  | 1.95 | Info  |
| PLAT794_ALERT_5_G | Tentative Bond Valency for Zn2                     | (II)  | 1.94 | Info  |
| PLAT860_ALERT_3_G | Number of Least-Squares Restraints                 | ..... | 2    | Note  |
| PLAT869_ALERT_4_G | ALERTS Related to the Use of SQUEEZE Suppressed    |       | !    | Info  |
| PLAT933_ALERT_2_G | Number of OMIT Records in Embedded .res File       | ...   | 7    | Note  |

---

0 **ALERT level A** = Most likely a serious problem - resolve or explain  
0 **ALERT level B** = A potentially serious problem, consider carefully  
24 **ALERT level C** = Check. Ensure it is not caused by an omission or oversight  
10 **ALERT level G** = General information/check it is not something unexpected

0 ALERT type 1 CIF construction/syntax error, inconsistent or missing data  
14 ALERT type 2 Indicator that the structure model may be wrong or deficient  
4 ALERT type 3 Indicator that the structure quality may be low  
14 ALERT type 4 Improvement, methodology, query or suggestion  
2 ALERT type 5 Informative message, check

---

It is advisable to attempt to resolve as many as possible of the alerts in all categories. Often the minor alerts point to easily fixed oversights, errors and omissions in your CIF or refinement strategy, so attention to these fine details can be worthwhile. In order to resolve some of the more serious problems it may be necessary to carry out additional measurements or structure refinements. However, the purpose of your study may justify the reported deviations and the more serious of these should normally be commented upon in the discussion or experimental section of a paper or in the "special\_details" fields of the CIF. checkCIF was carefully designed to identify outliers and unusual parameters, but every test has its limitations and alerts that are not important in a particular case may appear. Conversely, the absence of alerts does not guarantee there are no aspects of the results needing attention. It is up to the individual to critically assess their own results and, if necessary, seek expert advice.

### **Publication of your CIF in IUCr journals**

A basic structural check has been run on your CIF. These basic checks will be run on all CIFs submitted for publication in IUCr journals (*Acta Crystallographica*, *Journal of Applied Crystallography*, *Journal of Synchrotron Radiation*); however, if you intend to submit to *Acta Crystallographica Section C* or *E* or *IUCrData*, you should make sure that full publication checks are run on the final version of your CIF prior to submission.

### **Publication of your CIF in other journals**

Please refer to the *Notes for Authors* of the relevant journal for any special instructions relating to CIF submission.

---

**PLATON version of 13/12/2018; check.def file version of 11/12/2018**

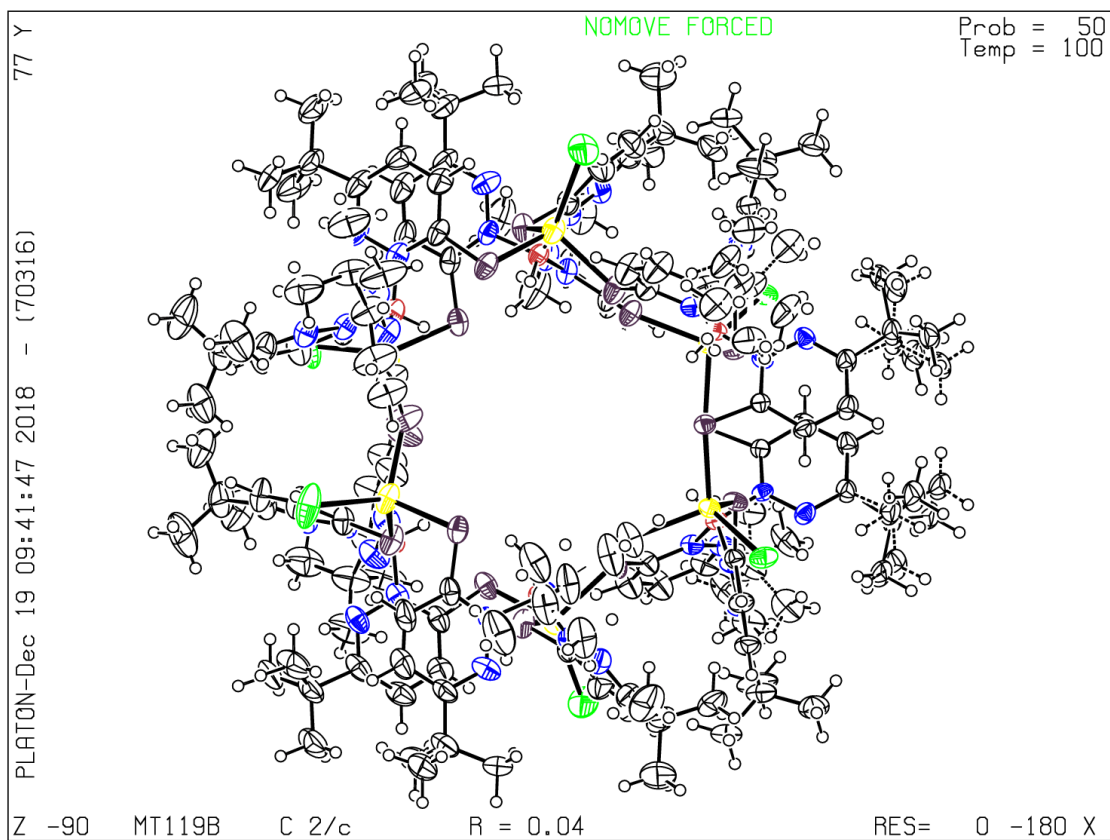



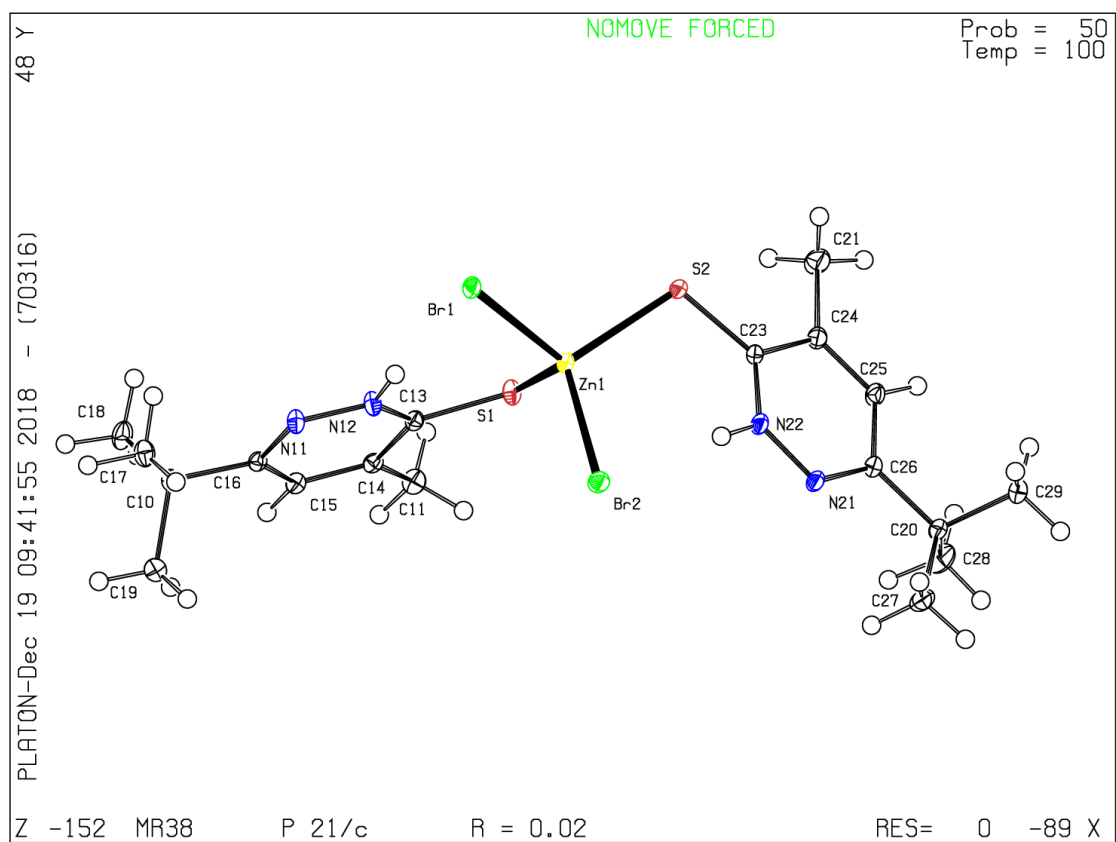

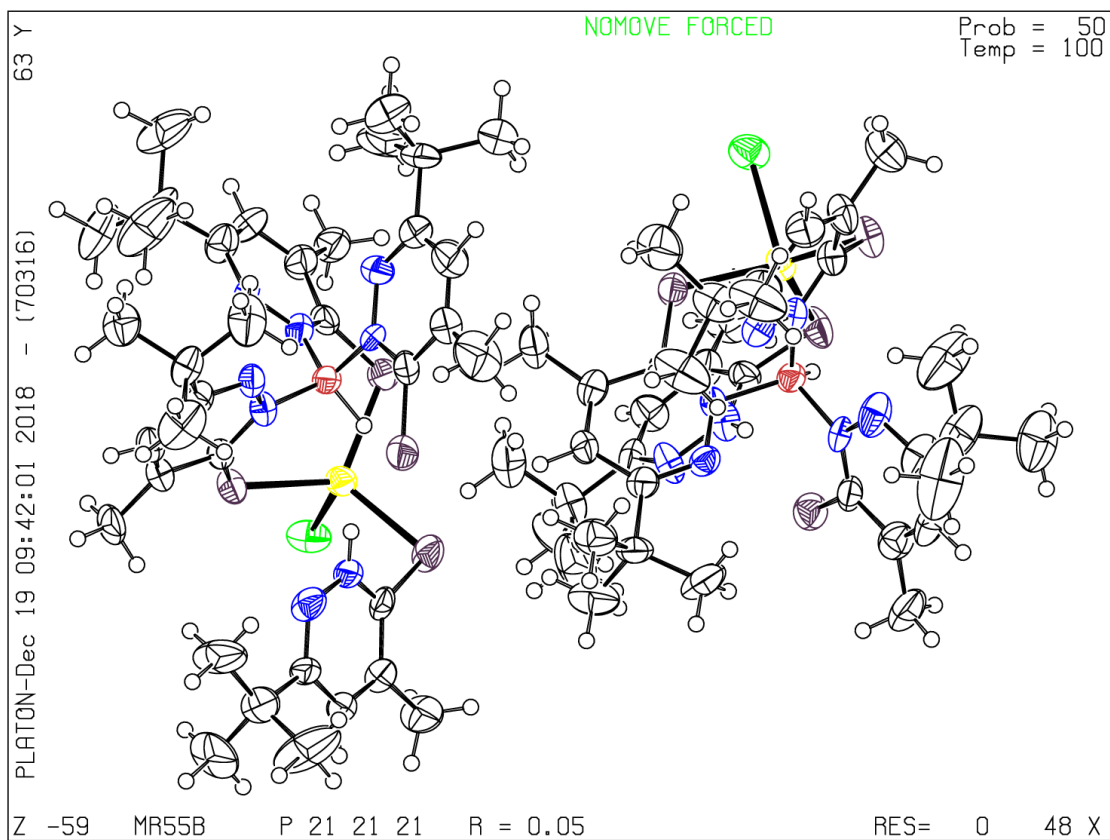

Supplement: s1 [file s1]
