# Supplementary material
Source: MDPI journal article supplement (https://www.mdpi.com/2304-6740/7/2/24)
Supplement: s1 [file s1]

# Supplementary Materials: Mono- and Hexanuclear Zinc Halide Complexes with Soft Thiopyridazine Based Scorpionate Ligands

Michael Tüchler, Melanie Ramböck, Simon Glanzer, Klaus Zangger, Ferdinand Belaj and Nadia C. Mösch-Zanetti

## Table of contents

|                                                                                                                                                                                                                                                                                                                                                               |     |
|---------------------------------------------------------------------------------------------------------------------------------------------------------------------------------------------------------------------------------------------------------------------------------------------------------------------------------------------------------------|-----|
| Figure S1. <sup>1</sup> H NMR spectrum of <b>1a</b> ·H <sub>2</sub> O in CDCl <sub>3</sub> . Resonances at 5.30 and 2.17 ppm are residual CH <sub>2</sub> Cl <sub>2</sub> and acetone. ....                                                                                                                                                                   | S3  |
| Figure S2. <sup>1</sup> H NMR spectrum of <b>1a</b> ·H <sub>2</sub> O in CDCl <sub>3</sub> after washing with D <sub>2</sub> O. Resonances at 5.30 and 2.17 ppm are residual CH <sub>2</sub> Cl <sub>2</sub> and acetone. ....                                                                                                                                | S3  |
| Figure S3. <sup>1</sup> H NMR spectrum of <b>1a</b> ·THF in CDCl <sub>3</sub> . ....                                                                                                                                                                                                                                                                          | S4  |
| Figure S4. <sup>1</sup> H NMR spectrum of <b>1a</b> in CDCl <sub>3</sub> without donor molecules. ....                                                                                                                                                                                                                                                        | S4  |
| Figure S5. <sup>1</sup> H NMR spectrum of <b>1a</b> ·2Py in CDCl <sub>3</sub> . ....                                                                                                                                                                                                                                                                          | S5  |
| Figure S6. <sup>1</sup> H NMR spectrum of <b>1b</b> ·H <sub>2</sub> O in CDCl <sub>3</sub> . ....                                                                                                                                                                                                                                                             | S5  |
| Figure S7. <sup>1</sup> H NMR spectrum of <b>1b</b> ·THF in CDCl <sub>3</sub> . ....                                                                                                                                                                                                                                                                          | S6  |
| Figure S8. <sup>1</sup> H NMR spectrum of <b>2a</b> in CDCl <sub>3</sub> . ....                                                                                                                                                                                                                                                                               | S6  |
| Figure S9. <sup>1</sup> H NMR spectrum of <b>2b</b> in CDCl <sub>3</sub> . ....                                                                                                                                                                                                                                                                               | S7  |
| Figure S10. <sup>1</sup> H NMR spectrum of <b>3</b> ·HPn <sup>Me,tBu</sup> in CDCl <sub>3</sub> . ....                                                                                                                                                                                                                                                        | S7  |
| Figure S11. Variable temperature <sup>1</sup> H NMR spectra of <b>3</b> ·HPn <sup>Me,tBu</sup> in CDCl <sub>3</sub> . ....                                                                                                                                                                                                                                    | S8  |
| Figure S12. Diffusion weighted <sup>1</sup> H NMR spectra of <b>1a</b> and PPh <sub>3</sub> in CDCl <sub>3</sub> . ....                                                                                                                                                                                                                                       | S8  |
| Figure S13. Diffusion weighted <sup>1</sup> H NMR spectra of <b>1a</b> ·2Py and cyclooctene in CDCl <sub>3</sub> . ....                                                                                                                                                                                                                                       | S9  |
| Table S1. Diffusion coefficients of <b>1a</b> , cyclooctene (COE), pyridine in <b>1a</b> ·2Py (Py <sub>(1a)</sub> ) and of free pyridine (Py).....                                                                                                                                                                                                            | S9  |
| Figure S14. UV-Vis Spectrum of a 0.027 mM solution of <b>1a</b> ·H <sub>2</sub> O in dichloromethane.....                                                                                                                                                                                                                                                     | S10 |
| Figure S15. UV-Vis spectrum of a 0.018 mM solution of <b>1b</b> ·H <sub>2</sub> O in dichloromethane.....                                                                                                                                                                                                                                                     | S10 |
| Figure S16. Thermogravimetric analysis of <b>1a</b> ·THF .....                                                                                                                                                                                                                                                                                                | S11 |
| Figure S17. ORTEP/POV-Ray plot of <b>1a</b> . Hydrogen atoms and solvent molecules are omitted for clarity. Atom code: Zn gray, B red, Br brown, N blue, S yellow. ....                                                                                                                                                                                       | S12 |
| Table S2. Selected bond lengths and angles for <b>1b</b> . ....                                                                                                                                                                                                                                                                                               | S13 |
| Figure S18. Left: ORTEP/POV-Ray plot of the asymmetric unit of <b>1b</b> . Hydrogen atoms, except for the B-H, solvent molecules and symmetric 2 <sup>nd</sup> half of the hexamer are omitted for clarity, right: ORTEP/POV-Ray plot of <b>1b</b> , top view. Color Code: Zn gray, I brown, B green, S yellow, B-H black. ....                               | S14 |
| Figure S19. Stereoscopic ORTEP/PovRay plot of <b>1b</b> . The atoms are drawn with arbitrary radii. The H atoms except those bonded to boron were omitted for clarity reasons. ....                                                                                                                                                                           | S14 |
| Table S3. Crystal data, data collection and refinement for [Tn <sup>tBu</sup> ZnI] <sub>6</sub> ( <b>1b</b> ).....                                                                                                                                                                                                                                            | S15 |
| Figure S20. Stereoscopic ORTEP1 plot of <b>2a</b> showing the atomic numbering scheme. The probability ellipsoids are drawn at the 50% probability level. The H atoms are drawn with arbitrary radii. The hydrogen bonds are indicated by dashed lines.....                                                                                                   | S16 |
| Figure S21. Stereoscopic ORTEP1 plot of complex <b>3</b> showing the atomic numbering scheme. The probability ellipsoids are drawn at the 30% probability level. The H atoms bonded to B or N are drawn with arbitrary radii, the others were omitted for clarity. The hydrogen bond and the contact Zn1···H1 [2.45(5) Å] is indicated by a dotted line. .... | S17 |

|                                                                                                                                                                                                                                                             |     |
|-------------------------------------------------------------------------------------------------------------------------------------------------------------------------------------------------------------------------------------------------------------|-----|
| Table S4. Crystal data, data collection and refinement for $[\text{Zn}(\text{HPn}^{\text{Me},t\text{Bu}})_2\text{Br}_2]$ ( <b>2a</b> )<br>and $[(\text{Tn}^{\text{Me},t\text{Bu}})\text{Zn}(\text{HPn}^{\text{Me},t\text{Bu}})\text{Br}]$ ( <b>3</b> )..... | S18 |
|-------------------------------------------------------------------------------------------------------------------------------------------------------------------------------------------------------------------------------------------------------------|-----|

## NMR Spectroscopy

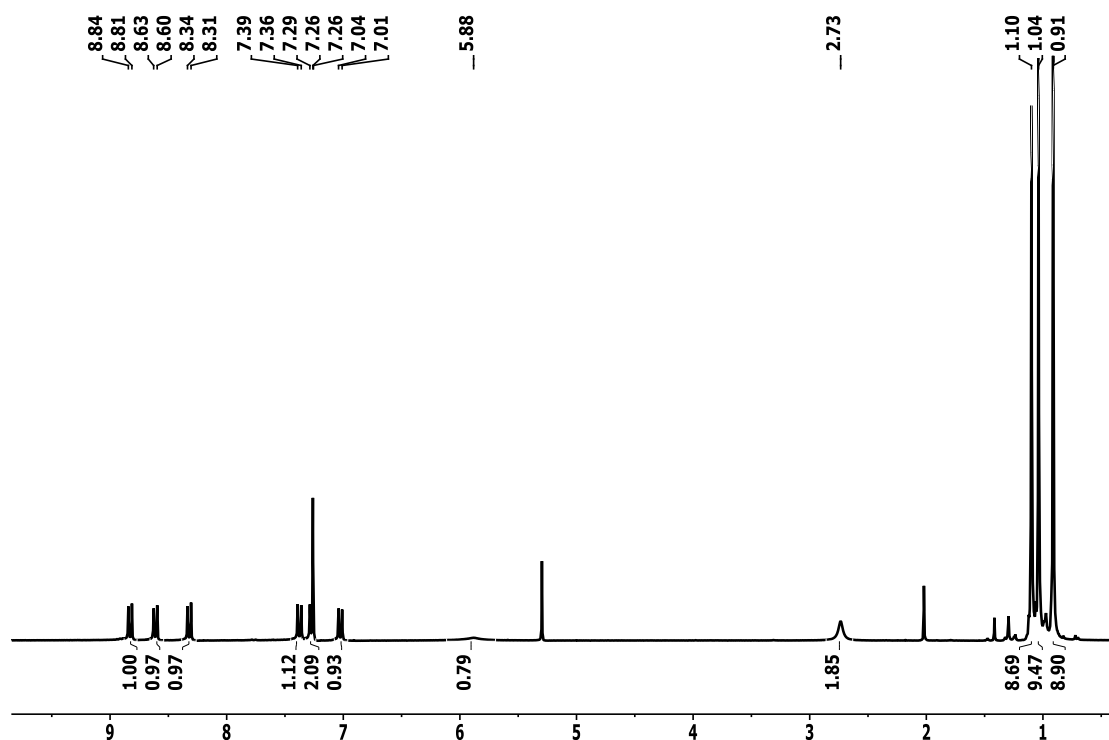

**Figure S1.** <sup>1</sup>H NMR spectrum of **1a**·H<sub>2</sub>O in CDCl<sub>3</sub>. Resonances at 5.30 and 2.17 ppm are residual CH<sub>2</sub>Cl<sub>2</sub> and acetone.

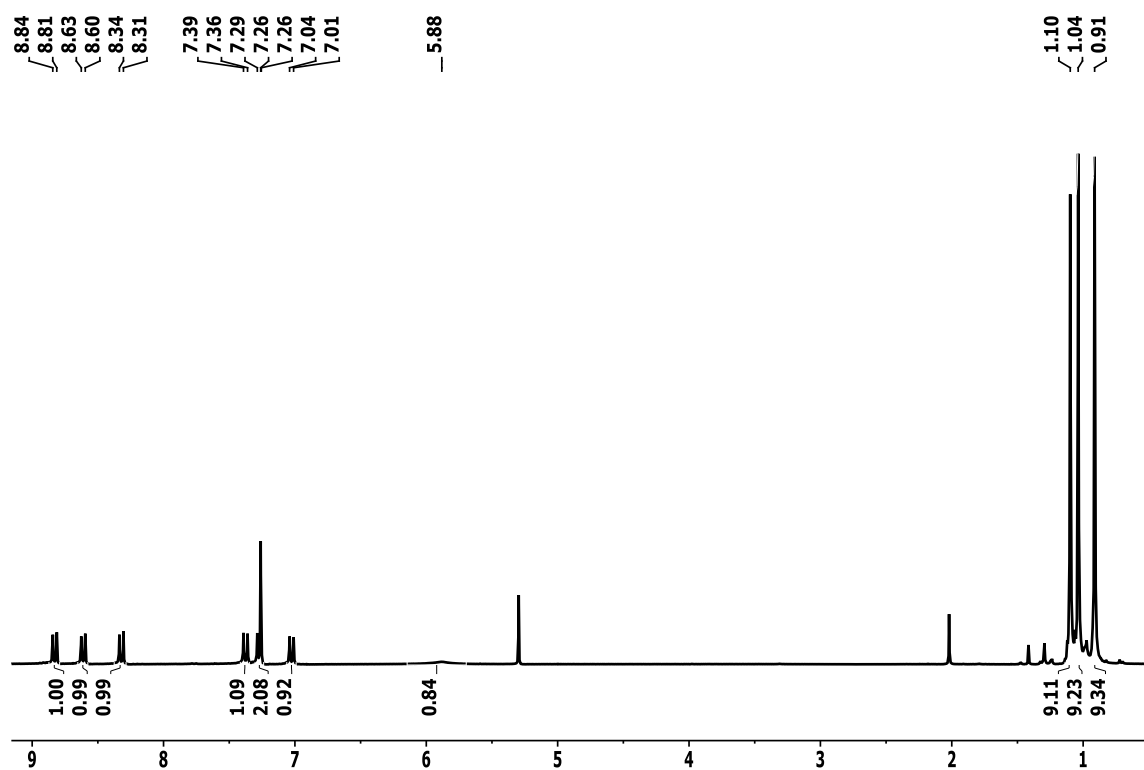

**Figure S2.** <sup>1</sup>H NMR spectrum of **1a**·H<sub>2</sub>O in CDCl<sub>3</sub> after washing with D<sub>2</sub>O. Resonances at 5.30 and 2.17 ppm are residual CH<sub>2</sub>Cl<sub>2</sub> and acetone.

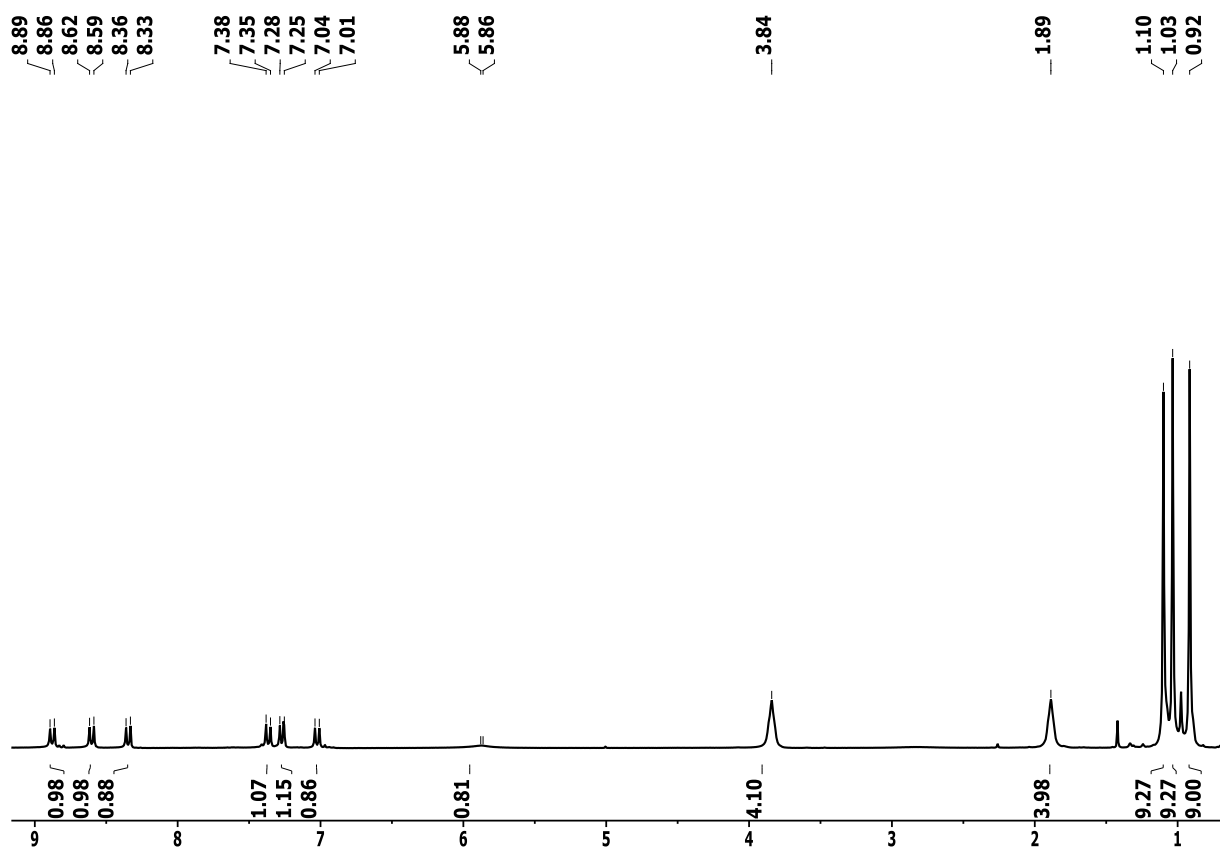

**Figure S3.** <sup>1</sup>H NMR spectrum of **1a**·THF in CDCl<sub>3</sub>.

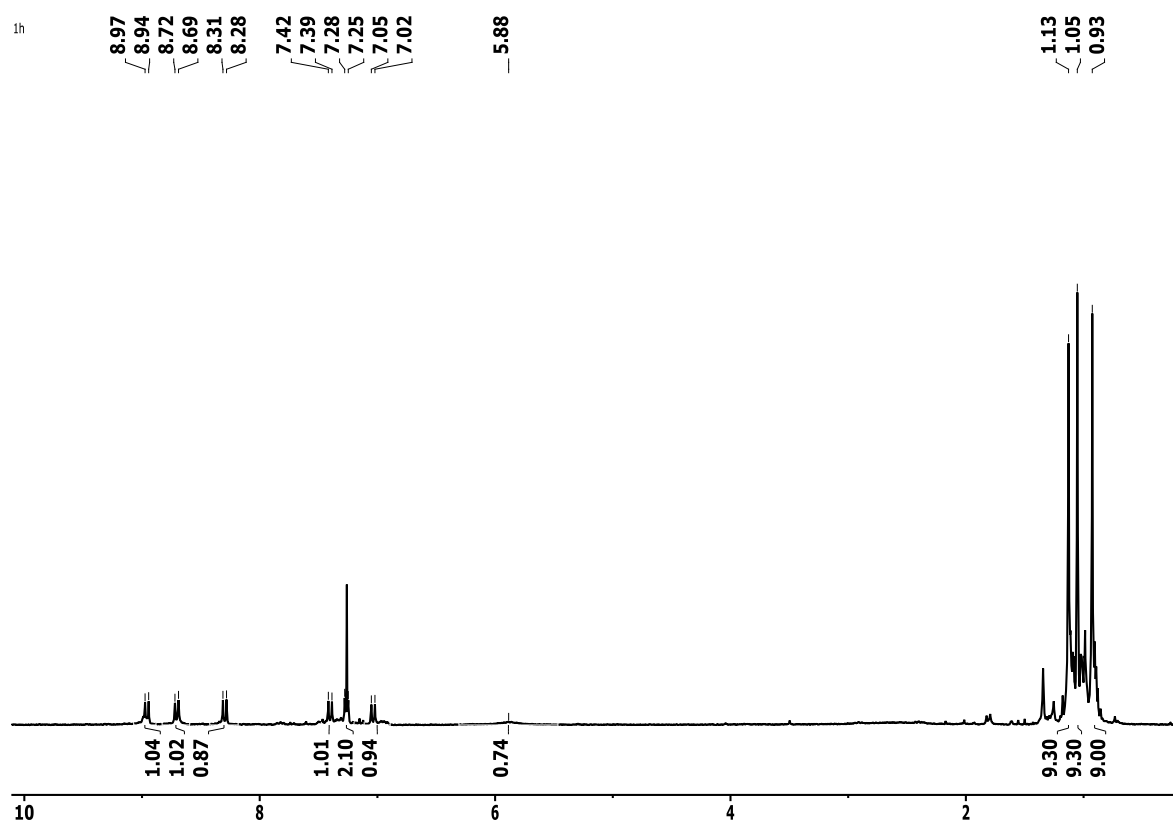

**Figure S4.** <sup>1</sup>H NMR spectrum of **1a** in CDCl<sub>3</sub> without donor molecules.

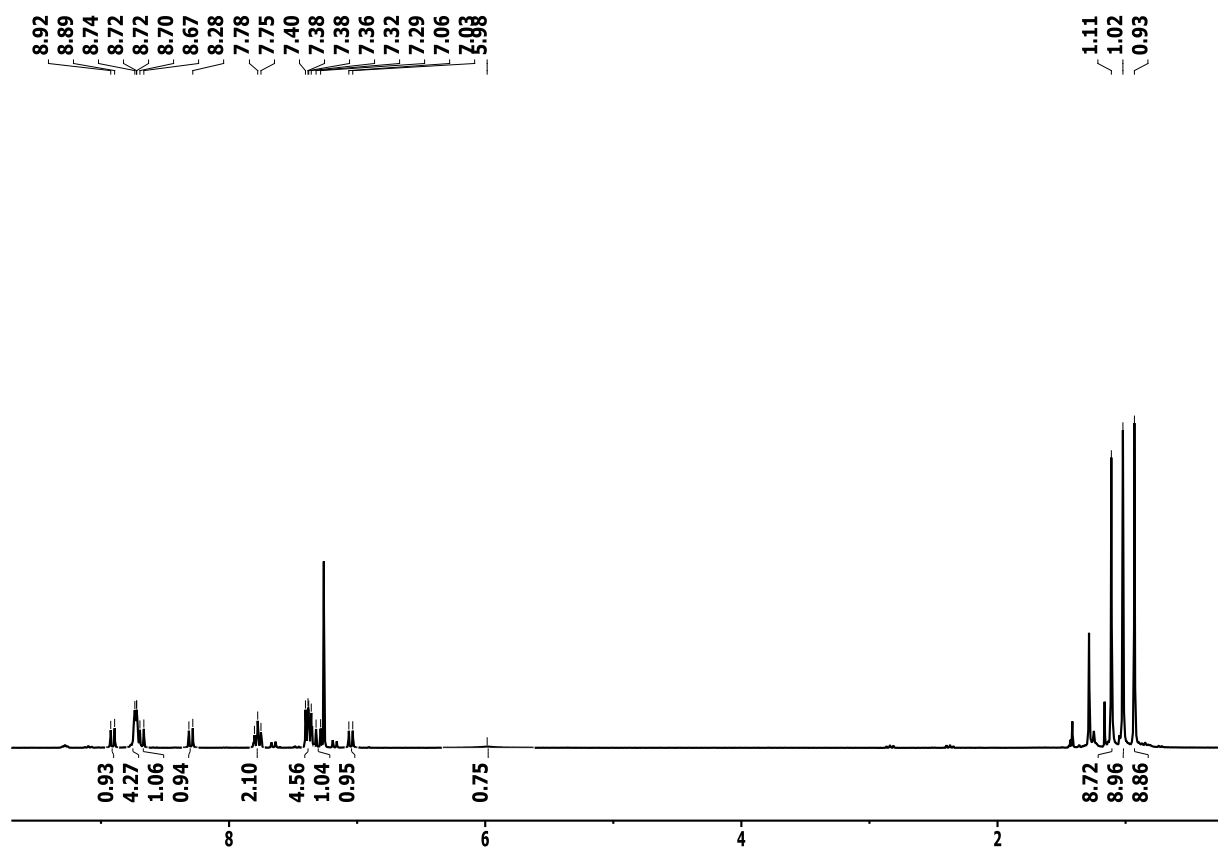

Figure S5. <sup>1</sup>H NMR spectrum of **1a**·2Py in CDCl<sub>3</sub>.

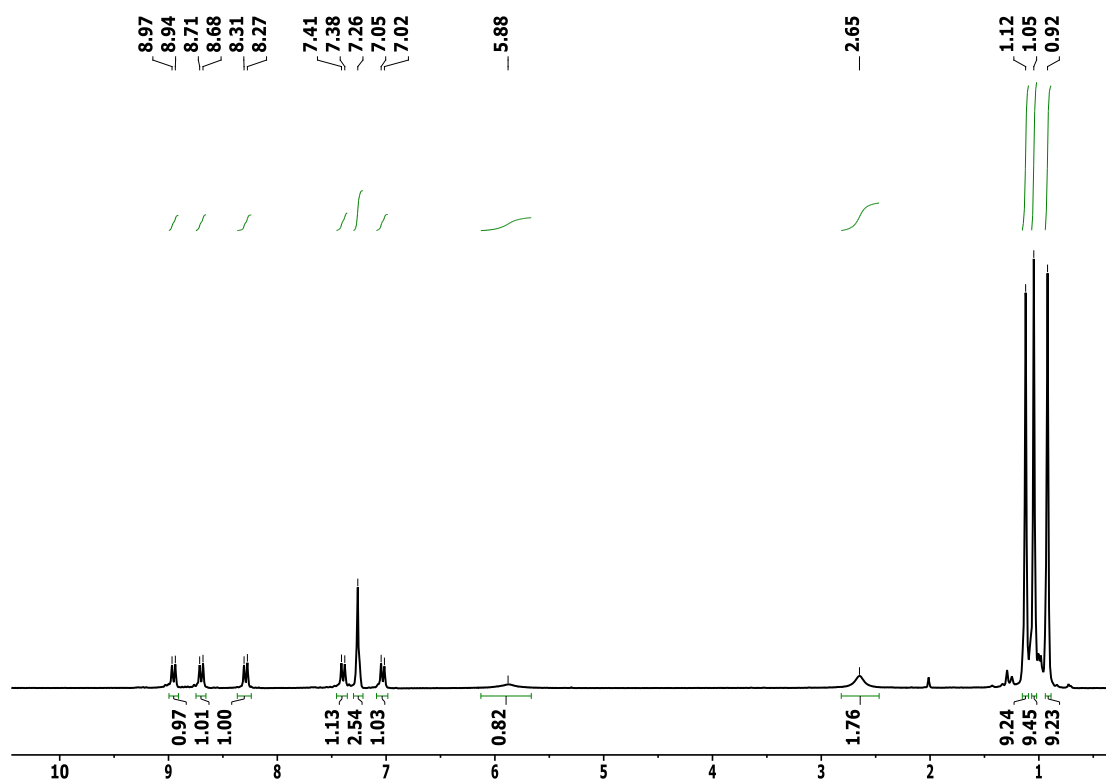

Figure S6. <sup>1</sup>H NMR spectrum of **1b**·H<sub>2</sub>O in CDCl<sub>3</sub>.

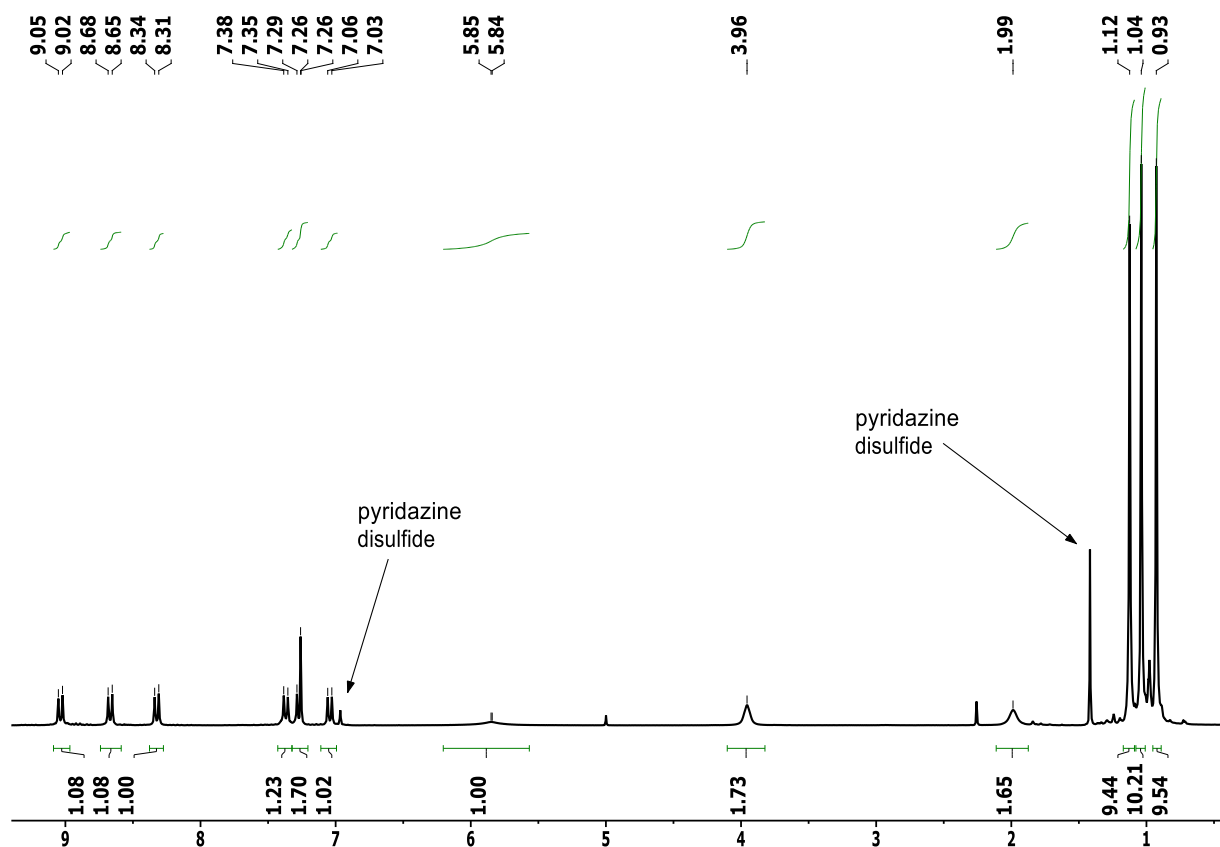

Figure S7. <sup>1</sup>H NMR spectrum of **1b**\*THF in CDCl<sub>3</sub>.

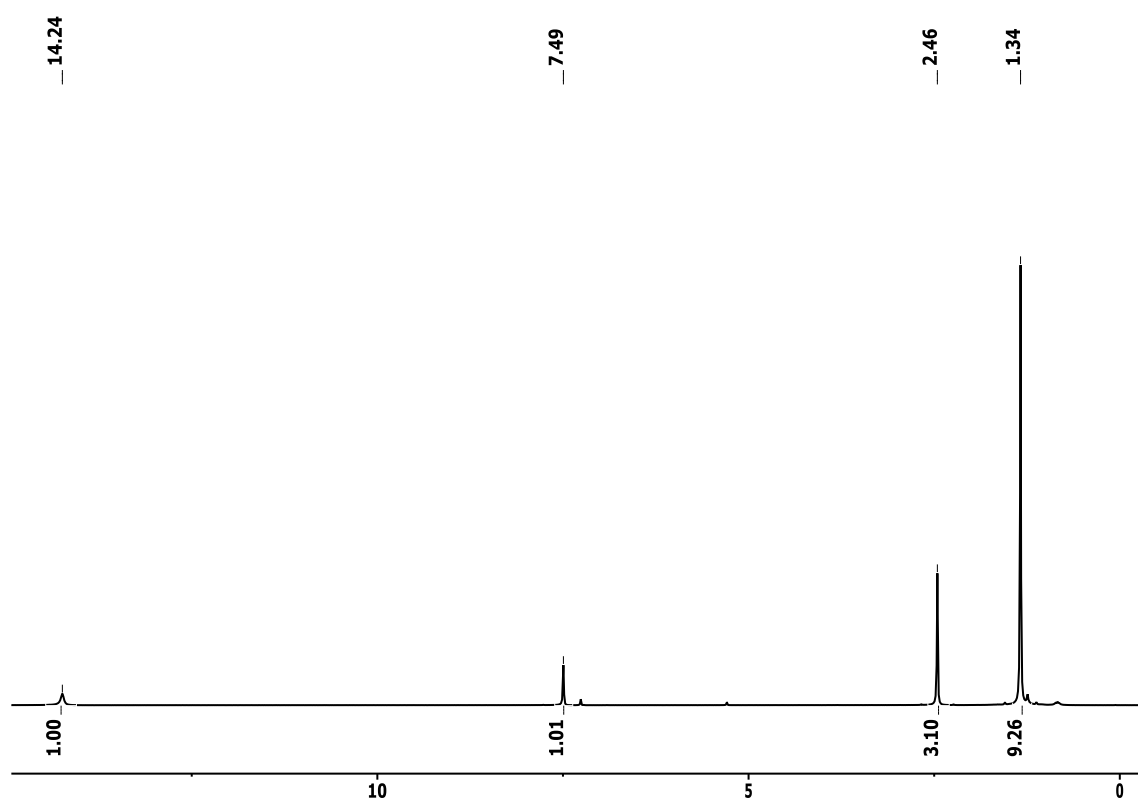

Figure S8. <sup>1</sup>H NMR spectrum of **2a** in CDCl<sub>3</sub>.

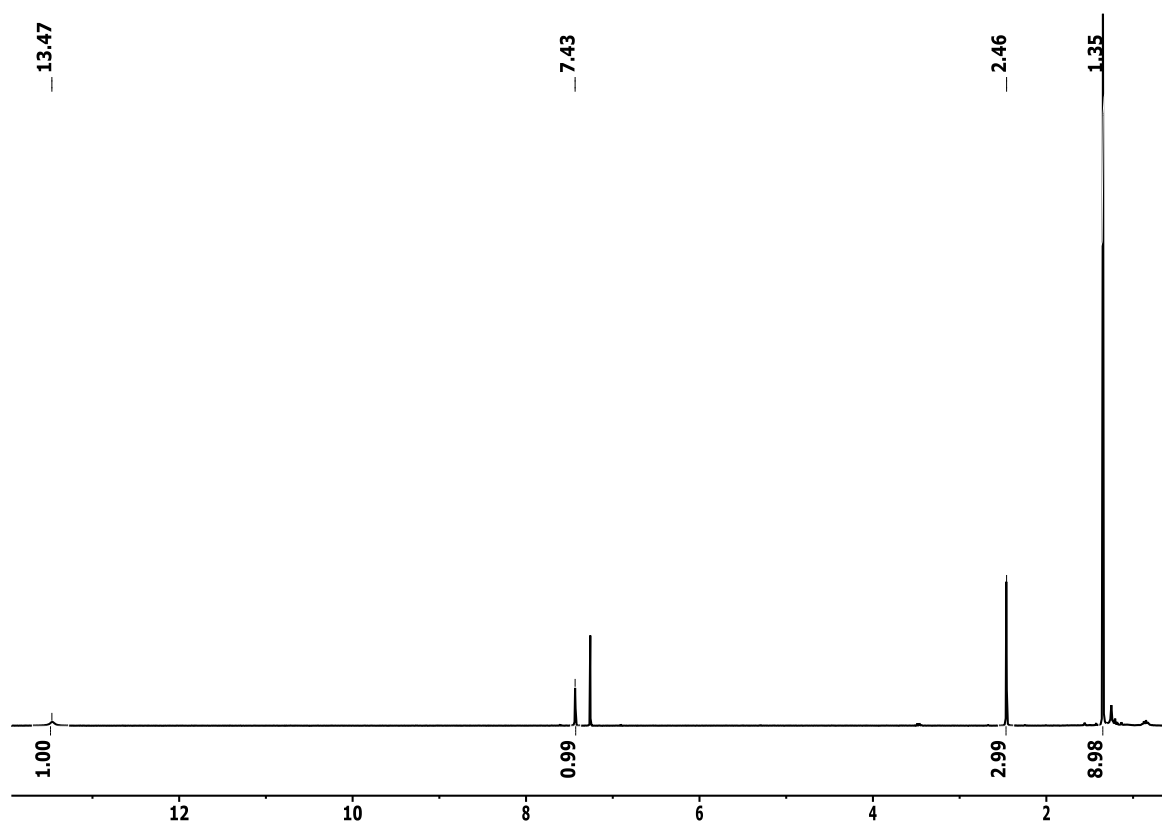

Figure S9. <sup>1</sup>H NMR spectrum of **2b** in CDCl<sub>3</sub>.

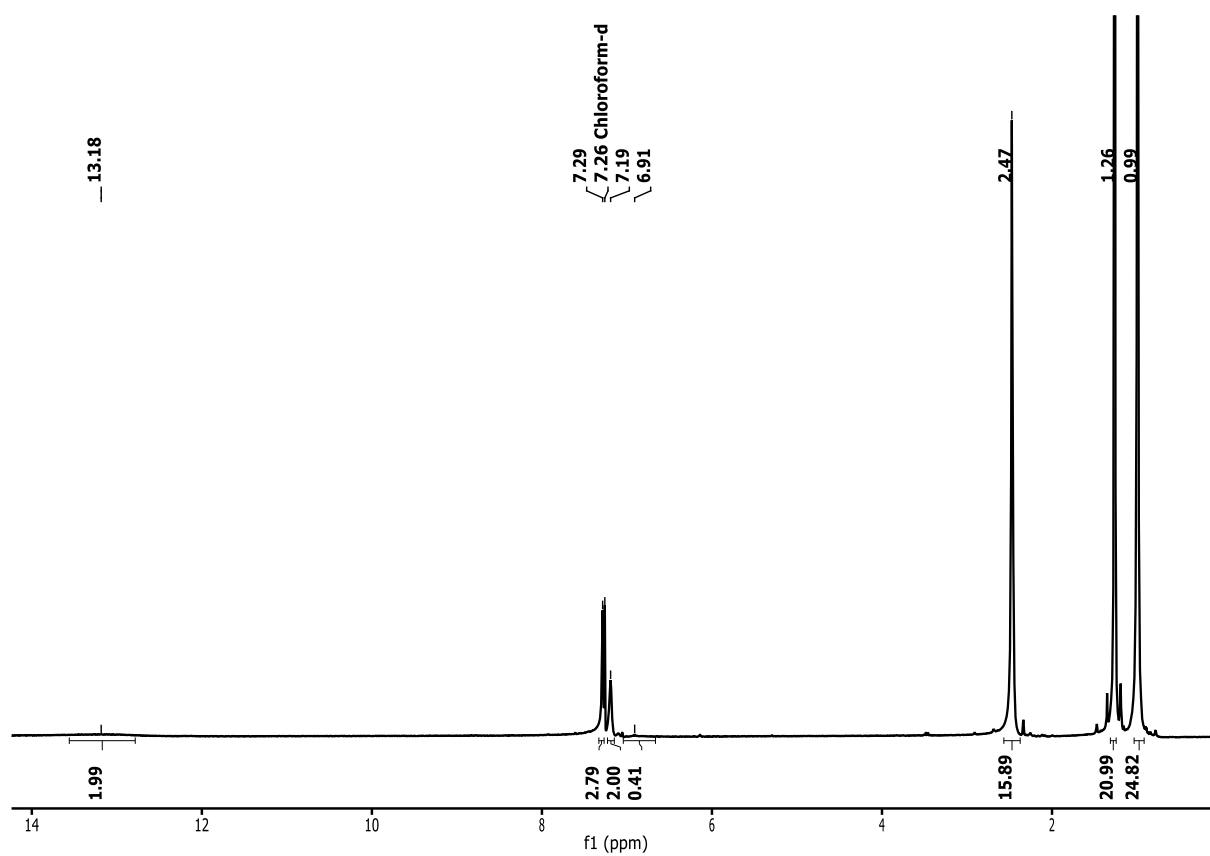

Figure S10. <sup>1</sup>H NMR spectrum of **3·HPn<sup>Me,tBu</sup>** in CDCl<sub>3</sub>.

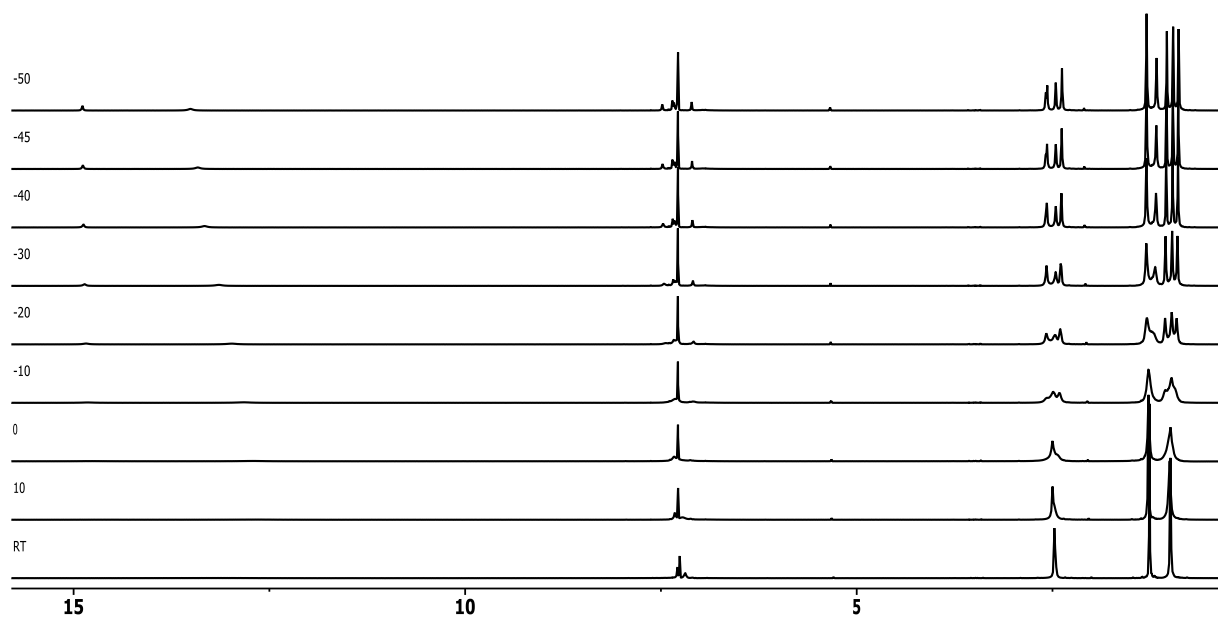

**Figure S11.** Variable temperature  $^1\text{H}$  NMR spectra of  $3\cdot\text{HPn}^{\text{Me,tBu}}$  in  $\text{CDCl}_3$

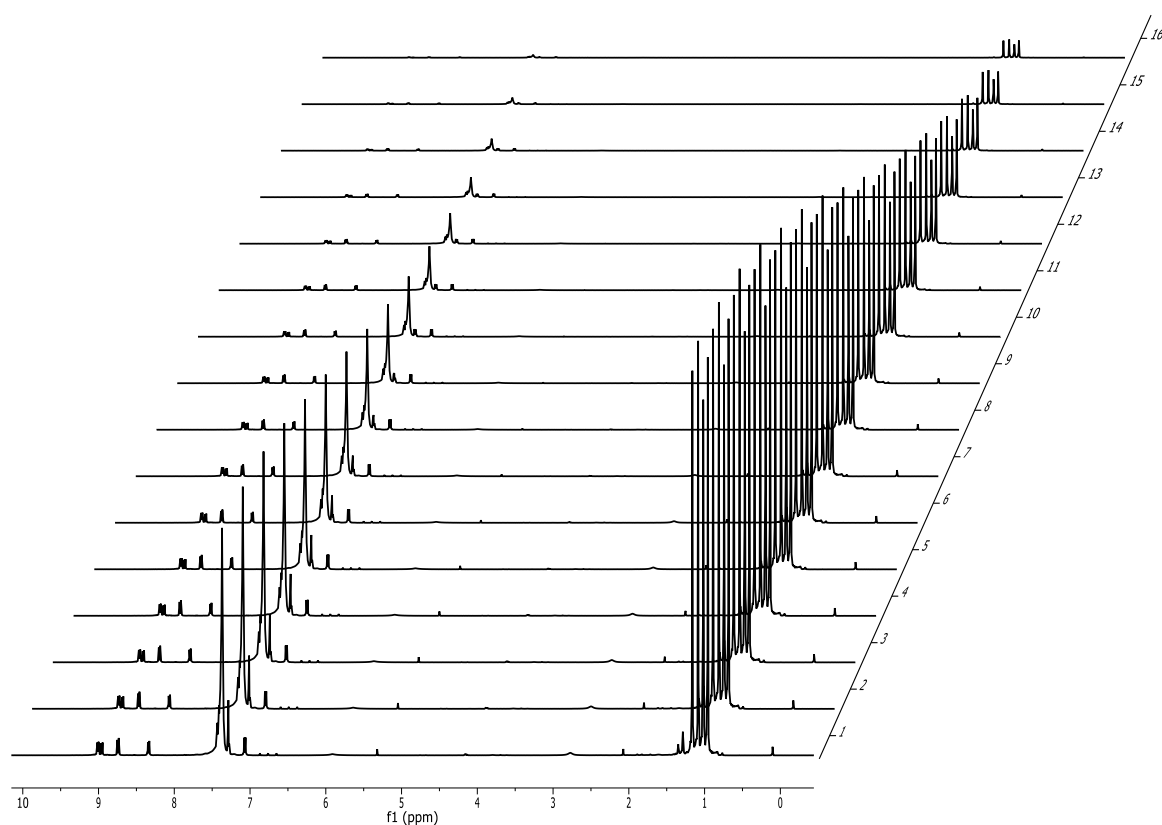

**Figure S22.** Diffusion weighted  $^1\text{H}$  NMR spectra of **1a** and  $\text{PPh}_3$  in  $\text{CDCl}_3$ .

For the determination of the hydrodynamic radius a 0.5 mM solution of **1a** in  $\text{CDCl}_3$  was prepared and spiked with 3 mg of  $\text{PPh}_3$  as internal standard. The hydrodynamic radius was calculated according to the Stokes – Einstein equation, where  $k_B$  is the Boltzmann constant,  $T$  the absolute temperature,  $\eta$  the dynamic viscosity of pure chloroform (due to the low concentration) and  $D$  the diffusion coefficient.



$$R_H = \frac{k_B T}{6\pi\eta D} \quad (\text{Eq. 1})$$

In a similar experiment, to a solution of **1a**, two equiv of pyridine were added together with 0.5 µL of cyclooctene as an internal standard.<sup>1</sup> After calibration, the hydrodynamic radius and the partition coefficient were calculated according to equations 1 and 2.

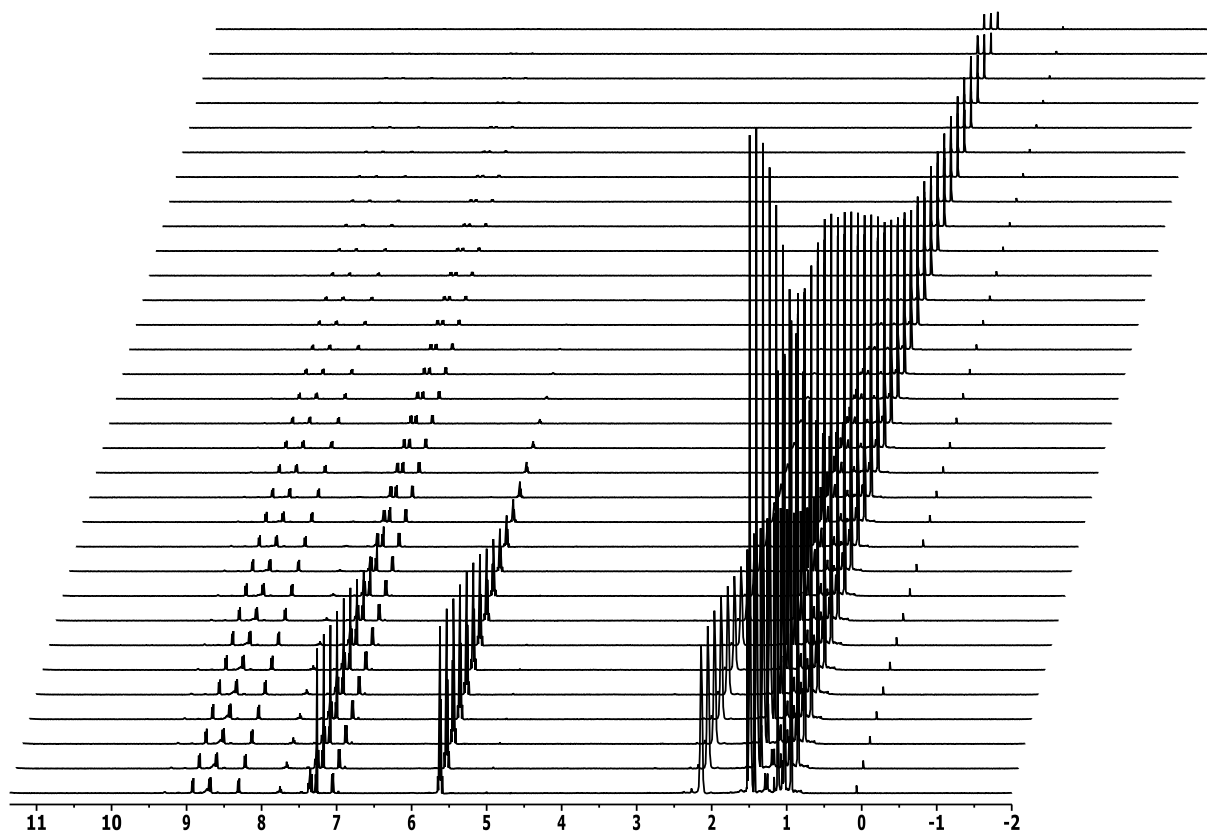

**Figure S33.** Diffusion weighted <sup>1</sup>H NMR spectra of **1a·2Py** and cyclooctene in CDCl<sub>3</sub>.

**Table S1.** Diffusion coefficients of **1a**, cyclooctene (COE), pyridine in **1a·2Py** (Py<sub>(1a)</sub>) and of free pyridine (Py)

|                    | D [10 <sup>-10</sup> m <sup>2</sup> /s] |
|--------------------|-----------------------------------------|
| <b>1a</b>          | 5.37                                    |
| COE                | 20.3                                    |
| Py <sub>(1a)</sub> | 19.1                                    |
| Py                 | 24.5                                    |

$$K = \frac{D_{Py(1a)} - D_{Py}}{D_{1a} - D_{Py(1a)}} \quad (\text{Eq. 2})$$

## UV-Vis spectroscopy

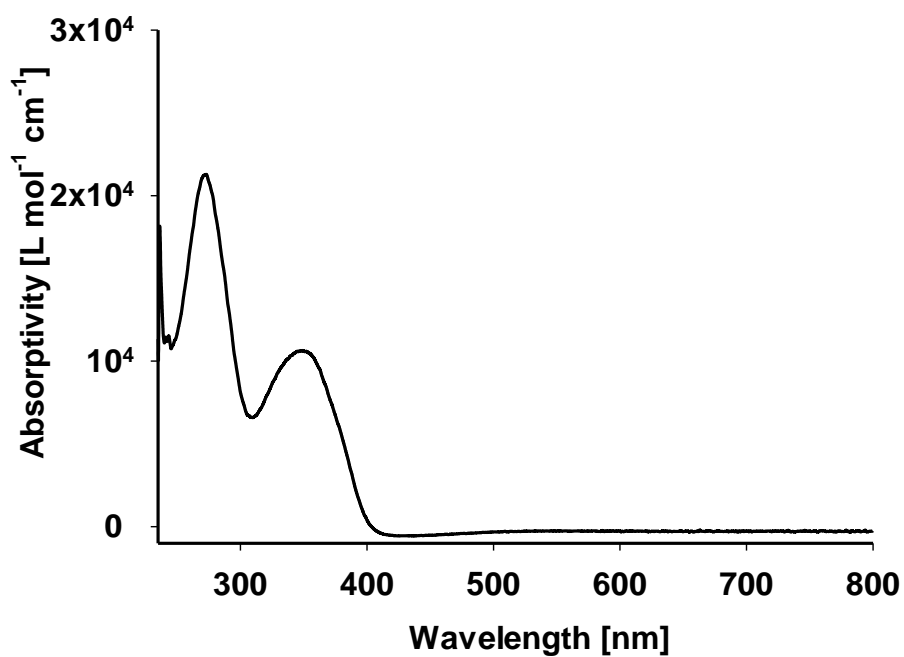

Figure S44. UV-Vis Spectrum of a 0.027 mM solution of **1a**·H<sub>2</sub>O in dichloromethane.

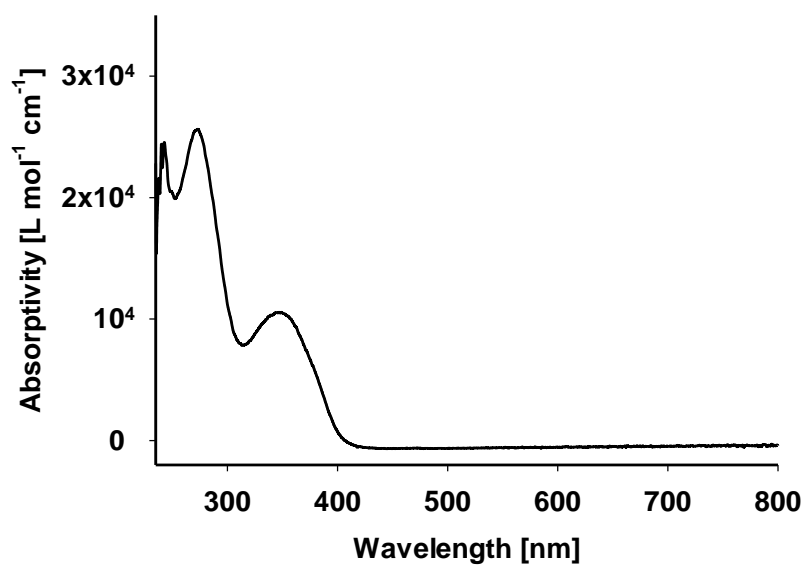

Figure S55. UV-Vis spectrum of a 0.018 mM solution of **1b**·H<sub>2</sub>O in dichloromethane.

## Thermogravimetric Analysis of 1a

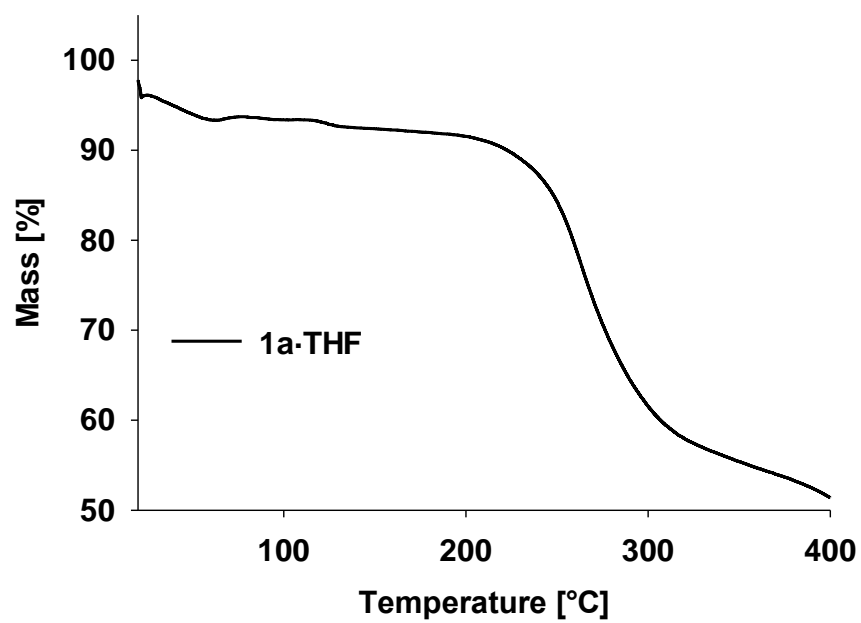

Figure S66. Thermogravimetric analysis of 1a·THF

## Molecular Structures

The molecular structures of complexes **1a**, **1b**, **2a** and **3** were determined, using single crystal X-ray diffraction analysis. Suitable crystals could be obtained by slow diffusion of pentane (**1a** and **1b**) into a chloroform solution and by slow evaporation of a chloroform solution (**2a** and **3**).

### $[\text{Tn}^{\text{tBu}}\text{ZnBr}]_6$ (**1a**)

Due to the low quality of the X-ray data, no discussion of the bond lengths and angles is possible. However, the connectivity can be determined, showing the isotype structure to **1b** [*comp.* **1a**:  $a = 29.0374(15) \text{ \AA}$ ,  $b = 29.8896(14) \text{ \AA}$ ,  $c = 30.7411(16) \text{ \AA}$ ,  $\beta = 102.387(2)^\circ$ , C 2/c vs. **1b**:  $a = 29.161(3) \text{ \AA}$ ,  $b = 30.102(3) \text{ \AA}$ ,  $c = 31.045(3) \text{ \AA}$ ,  $\beta = 102.323(2)^\circ$ , C 2/c].

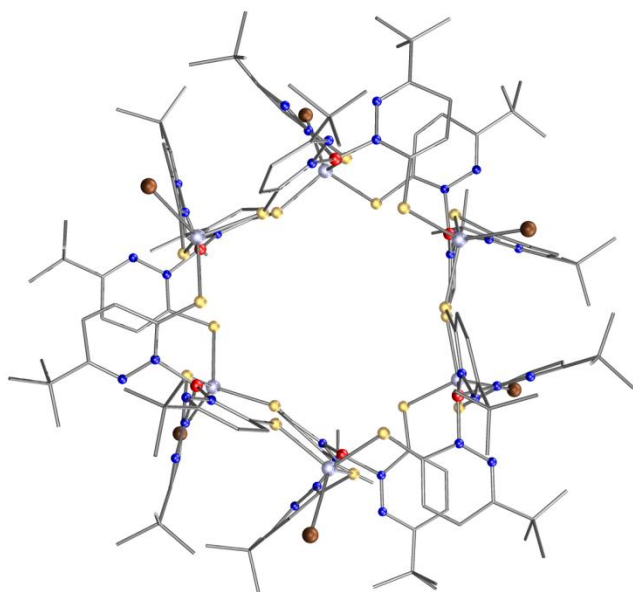

**Figure S77.** ORTEP/POV-Ray plot of **1a**. Hydrogen atoms and solvent molecules are omitted for clarity. Atom code: Zn gray, Br red, N blue, S yellow.

**[Tn<sup>tBu</sup>ZnI]<sub>6</sub> (1b)**

Besides the described hexameric complex there are large regions containing disordered n-hexane molecules, both within as well as outside the hexameric molecules. Since it was not possible to describe the refined peaks of residual electron density as partially occupied individual solvent molecules, the diffuse electron density in these regions was removed by the SQUEEZE routine of the PLATON program.<sup>3</sup> The SQUEEZE routine computed a very large void volume of 10143 Å<sup>3</sup> (38.1% of the unit cell) with an electron count of approx. 3177 per unit cell (consistent with 64 n-hexane molecules with 50 electrons each). Two *tert*-butyl groups (bonded to C16, C36) were disordered over two orientations and refined with site occupation factors of 0.843(7) and 0.838(7), respectively, for the more prominent occupied orientations. The same anisotropic displacement parameters were used for equivalent C atoms of these disordered *tert*-butyl groups and the C–C distances were restrained to 1.53 Å. The largest peaks in a final difference Fourier map (1.12 - 1.14 eÅ<sup>-3</sup>) were in the vicinity (0.32 - 0.84 Å) of the I atoms. For 1010 parameters final *R* indices of *R*<sub>1</sub> = 0.0524 and *wR*<sup>2</sup> = 0.1624 (GOF = 1.079) were obtained.

**Table S2.** Selected bond lengths and angles for **1b**

| Bond lengths | [Å]        | Bond angles     | [°]        |
|--------------|------------|-----------------|------------|
| I1 – Zn1     | 2.6158(4)  | S4 – Zn1 – S2   | 101.14(3)  |
| I2 – Zn2     | 2.6014(5)  | S4 – Zn1 – S1'  | 109.03(3)  |
| I3 – Zn3     | 2.5916(5)  | S2 – Zn1 – S1'  | 98.87(3)   |
| Zn1 – S1'    | 2.3506(8)  | S4 – Zn1 – I1   | 114.68(2)  |
| Zn1 – S2     | 2.3460(8)  | S2 – Zn1 – I1   | 118.16(2)  |
| Zn1 – S4     | 2.3316(9)  | S1' – Zn1 – I1  | 113.23(2)  |
| Zn2 – S3     | 2.3346(9)  | S3 – Zn2 – S5   | 102.04(3)  |
| Zn2 – S5     | 2.3466(9)  | S3 – Zn2 – S7   | 108.48(4)  |
| Zn2 – S7     | 2.3511(10) | S5 – Zn2 – S7   | 99.98(3)   |
| Zn3 – S6     | 2.3435(9)  | S3 – Zn2 – I2   | 112.53(3)  |
| Zn3 – S8     | 2.3547(9)  | S5 – Zn2 – I2   | 118.64(3)  |
| Zn3 – S9'    | 2.3262(12) | S7 – Zn2 – I2   | 113.78(3)  |
| B1 – N12     | 1.547(4)   | S9' – Zn3 – S6  | 108.45(4)  |
| B1 – N22     | 1.566(4)   | S9' – Zn3 – S8  | 100.17(4)  |
| B1 – N32     | 1.575(4)   | S6 – Zn3 – S8   | 100.23(3)  |
| B2 – N42     | 1.574(4)   | S9' – Zn3 – I3  | 113.33(3)  |
| B2 – N52     | 1.560(4)   | S6 – Zn3 – I3   | 114.63(3)  |
| B2 – N62     | 1.568(4)   | S8 – Zn3 – I3   | 118.31(3)  |
| B3 – N72     | 1.552(5)   | C13 – S1 – Zn1' | 102.45(10) |
| B3 – N82     | 1.564(5)   | C23 – S2 – Zn1  | 107.97(10) |
| B3 – N92     | 1.564(5)   | C33 – S3 – Zn2  | 107.42(11) |
|              |            | C43 – S4 – Zn1  | 108.27(11) |
|              |            | C53 – S5 – Zn2  | 107.58(12) |
|              |            | C63 – S6 – Zn3  | 101.55(11) |
|              |            | C73 – S7 – Zn2  | 101.14(12) |
|              |            | C83 – S8 – Zn3  | 107.56(12) |
|              |            | C93 – S9 – Zn3' | 109.02(15) |

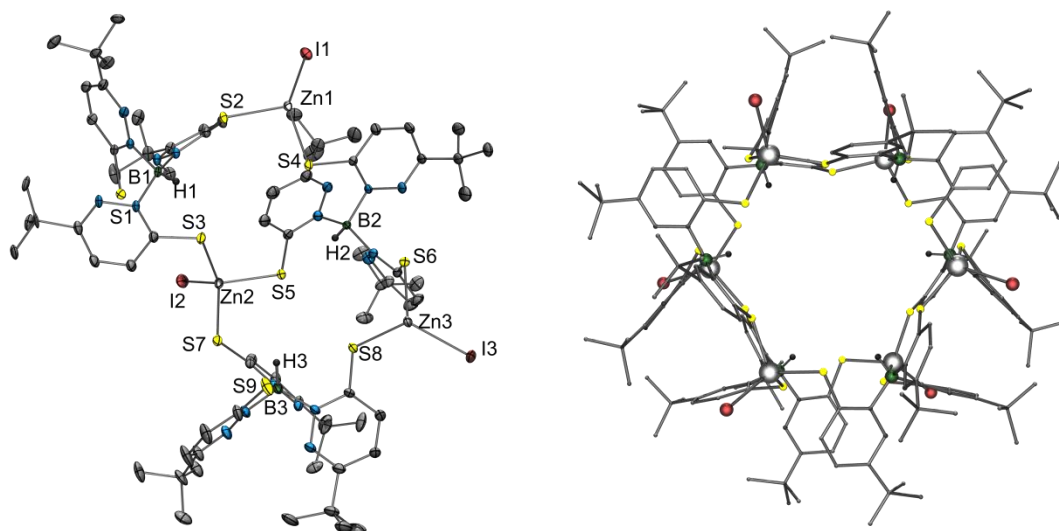

**Figure S88.** Left: ORTEP/POV-Ray plot of the asymmetric unit of **1b**. Hydrogen atoms, except for the B-H, solvent molecules and symmetric 2<sup>nd</sup> half of the hexamer are omitted for clarity, right: ORTEP/POV-Ray plot of **1b**, top view. Color Code: Zn gray, I brown, B green, S yellow, B-H black.

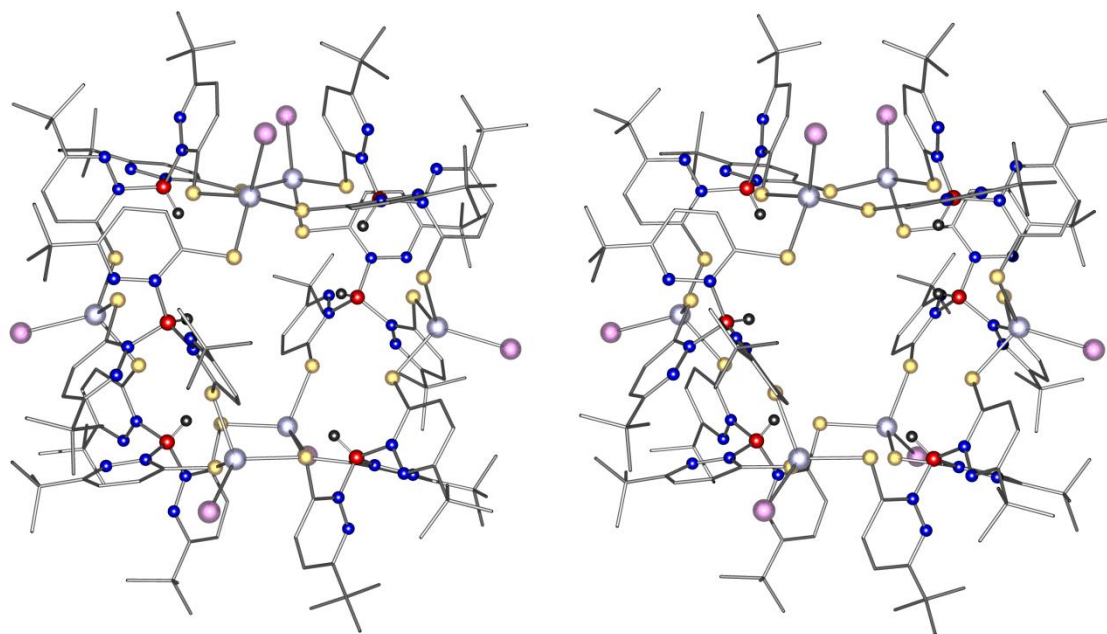

**Figure S99.** Stereoscopic ORTEP/PovRay plot of **1b**. The atoms are drawn with arbitrary radii. The H atoms except those bonded to boron were omitted for clarity reasons.

**Table S3.** Crystal data, data collection and refinement for  $[\text{Tn}^{\text{tBu}}\text{ZnI}]_6$  (**1b**)

| Crystal data                          | <b>1b</b>                                                                                                               |
|---------------------------------------|-------------------------------------------------------------------------------------------------------------------------|
| Empirical formula                     | $\text{C}_{144}\text{H}_{204}\text{B}_6\text{I}_6\text{N}_{36}\text{S}_{18}\text{Zn}_6 \cdot 16\text{C}_6\text{H}_{14}$ |
| Formula weight                        | 5613.72                                                                                                                 |
| Crystal description                   | Block, colourless                                                                                                       |
| Crystal size                          | 0.33 x 0.30 x 0.24 mm                                                                                                   |
| Crystal system, space group           | monoclinic, C 2/c                                                                                                       |
| Unit cell dimension                   |                                                                                                                         |
| a                                     | 29.161(3) Å                                                                                                             |
| b                                     | 30.102(3) Å                                                                                                             |
| c                                     | 31.045(3) Å                                                                                                             |
| $\beta$                               | 102.323(2)°                                                                                                             |
| Volume                                | 26624(5) Å <sup>3</sup>                                                                                                 |
| Z                                     | 4                                                                                                                       |
| Calculated density                    | 1.401 mg/m <sup>3</sup>                                                                                                 |
| F(000)                                | 12144                                                                                                                   |
| Linear absorption coefficient $\mu$   | 1.428 mm <sup>-1</sup>                                                                                                  |
| Max. and min. transmission            | 1.0 and 0.735                                                                                                           |
| Unit cell determination               | 2.45° < $\theta$ < 26.95°                                                                                               |
|                                       | 9343 reflections used at 100K                                                                                           |
| Data collection                       |                                                                                                                         |
| Temperature                           | 100 K                                                                                                                   |
| Diffractometer                        | Bruker APEX-II CCD                                                                                                      |
| Radiation source                      | fine-focus sealed tube                                                                                                  |
| Radiation and wavelength              | MoK $\alpha$ , 0.71073 Å                                                                                                |
| Monochromator                         | graphite                                                                                                                |
| Scan type                             | $\phi$ and $\omega$ scans                                                                                               |
| $\theta$ range for data collection    | 1.97 to 26.00°                                                                                                          |
| Reflections collected / unique        | 181208 / 26154                                                                                                          |
| Significant unique reflections        | 19711 with $I > 2\sigma(I)$                                                                                             |
| R(int), R(sigma)                      | 0.0405, 0.0389                                                                                                          |
| Completeness ( $\theta$ )             | 99.9% (26.0°)                                                                                                           |
| Refinement                            |                                                                                                                         |
| Refinement method                     | Full-matrix least-squares on F <sup>2</sup>                                                                             |
| Data / parameters / restraints        | 26154 / 1018 / 15                                                                                                       |
| Goodness-of-fit on F <sup>2</sup>     | 1.134                                                                                                                   |
| Final R indices [ $I > 2\sigma(I)$ ]  | R1 = 0.0399, wR2 = 0.1100                                                                                               |
| R indices (all data)                  | R1 = 0.0537, wR2 = 0.1151                                                                                               |
| Extinction expression                 | none                                                                                                                    |
| Largest $\Delta/\sigma$ in last cycle | 0.003                                                                                                                   |
| Largest difference peak and hole      | 1.120 and -1.416 e/Å <sup>3</sup>                                                                                       |
| Structure Solution Program            | SHELXS-97 <sup>2</sup>                                                                                                  |
| Structure Refinement Program          | SHELXL-2014/6 <sup>3</sup>                                                                                              |
| CCDC number                           | 1510468                                                                                                                 |

**[Zn(HPn<sup>Me,tBu</sup>)<sub>2</sub>Br<sub>2</sub>] (2a)**

The positions of the H atoms H12 and H22 were taken from a difference Fourier map, the N–H distances were fixed to 0.88 Å, and these H atoms were refined without any constraints to the bond angles. For 268 parameters final *R* indices of *R*<sub>1</sub> = 0.0224 and *wR*<sup>2</sup> = 0.0500 (GOF = 1.046) were obtained. The largest peak in a difference Fourier map was 0.656 eÅ<sup>−3</sup>.

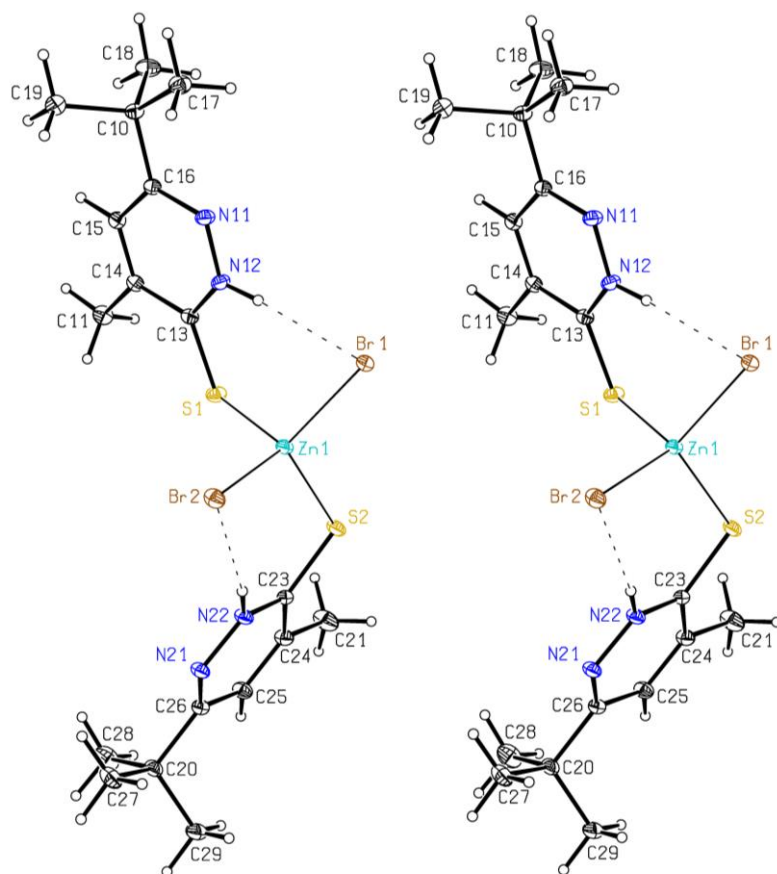

**Figure S20.** Stereoscopic ORTEP1 plot of **2a** showing the atomic numbering scheme. The probability ellipsoids are drawn at the 50% probability level. The H atoms are drawn with arbitrary radii. The hydrogen bonds are indicated by dashed lines



**$[(\text{Tn}^{\text{Me,tBu}})\text{Zn}(\text{HPn}^{\text{Me,tBu}})\text{Br}]$  (3)**

The absolute configuration was established by anomalous dispersion effects in the diffraction measurements on the crystal. Since racemic twinning was detected a twin matrix  $(-1\ 0\ 0 / 0\ -1\ 0 / 0\ 0\ -1)$  was applied and a scale factor was refined  $[0.078(11)]$  between the two unequal components. The non-hydrogen atoms of both complexes of the asymmetric unit were refined with anisotropic displacement parameters without any constraints. The H atoms bonded to B and co-ordinated to Zn were clearly identified in a difference Fourier map and were refined without any positional constraints with individual isotropic displacement parameters. The positions of the H atoms of the NH groups were taken from a difference Fourier map, the N–H distances were fixed to  $0.88\text{\AA}$ , and these H atoms were refined with a common isotropic displacement parameter without any constraints to the bond angles. Besides the described molecules there are four large regions containing disordered solvent molecules. Since it was not possible to describe the refined peaks of residual electron density as partially occupied individual solvent molecules, the diffuse electron density in these regions was removed by the SQUEEZE routine of the PLATON program<sup>4</sup>. The solvent contribution to the calculated structure factors for each reflection  $hkl$  is included in the FAB file. The SQUEEZE routine resulted in a void volume of  $1469\text{\AA}^3$  (15.1% of the unit cell) with an electron count of 358 per unit cell. Since the atoms of the unknown solvent molecules are not included in the UNIT instruction, the values of the reported chemical formula, molecular weight, density,  $F_{000}$ , and of the absorption coefficient are too low. For 961 parameters final  $R$  indices of  $R_1 = 0.0526$  and  $wR^2 = 0.1315$  (GOF = 1.014) were obtained. The largest peak in a difference Fourier map was  $0.662\text{ e}\text{\AA}^{-3}$ .

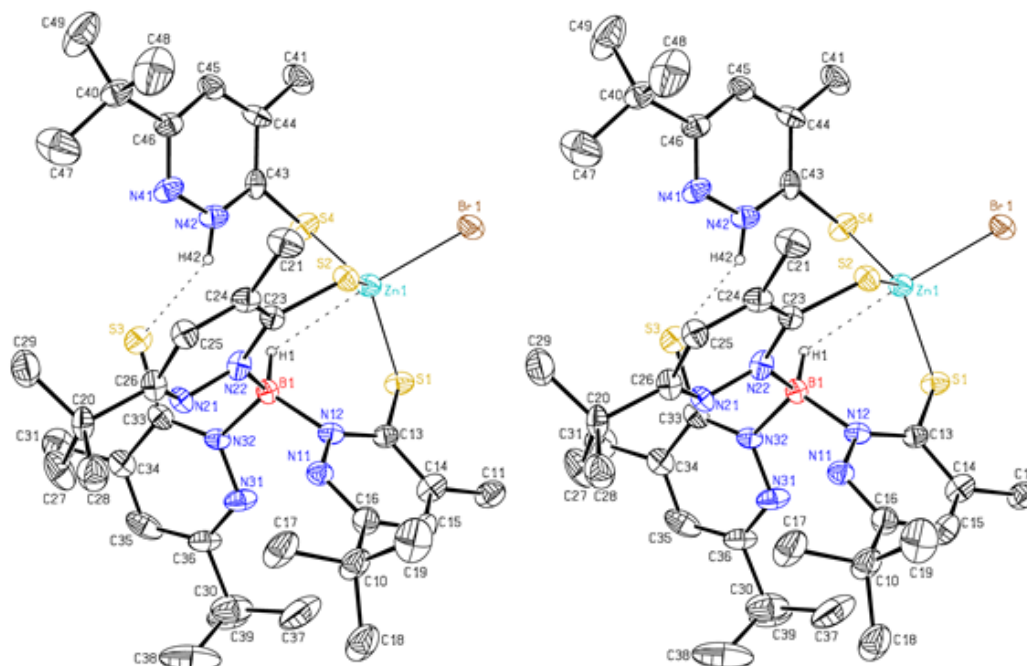

**Figure S21.** Stereoscopic ORTEP<sup>1</sup> plot of complex **3** showing the atomic numbering scheme. The probability ellipsoids are drawn at the 30% probability level. The H atoms bonded to B or N are drawn with arbitrary radii, the others were omitted for clarity. The hydrogen bond and the contact  $\text{Zn1}\cdots\text{H1}$  [ $2.45(5)\text{\AA}$ ] is indicated by a dotted line.

**Table S4.** Crystal data, data collection and refinement for [Zn(HPn<sup>Me,tBu</sup>)<sub>2</sub>Br<sub>2</sub>] (**2a**) and [(Tn<sup>Me,tBu</sup>)Zn(HPn<sup>Me,tBu</sup>)Br] (**3**)

| Crystal data                      | 2a                                                                               | 3                                                                   |
|-----------------------------------|----------------------------------------------------------------------------------|---------------------------------------------------------------------|
| Empirical formula                 | C <sub>18</sub> H <sub>28</sub> Br <sub>2</sub> N <sub>4</sub> S <sub>2</sub> Zn | C <sub>36</sub> H <sub>54</sub> BBrN <sub>8</sub> S <sub>4</sub> Zn |
| Formula weight                    | 589.75                                                                           | 883.20                                                              |
| Crystal description               | block, colourless                                                                | needle, yellow                                                      |
| Crystal size                      | 0.30 x 0.28 x 0.15 mm                                                            | 0.19 x 0.17 x 0.14 mm                                               |
| Crystal system, space group       | monoclinic, P 21/c                                                               | orthorhombic, P 21 21 21                                            |
| Unit cell dimensions:             |                                                                                  |                                                                     |
| a                                 | 10.2147(3) Å                                                                     | 16.6456(19) Å                                                       |
| b                                 | 8.6489(2) Å                                                                      | 16.9851(19) Å                                                       |
| c                                 | 27.2498(8) Å                                                                     | 34.357(4) Å                                                         |
| β                                 | 96.6196(13)°                                                                     |                                                                     |
| Volume                            | 2391.36(11) Å <sup>3</sup>                                                       | 9713.6(19) Å <sup>3</sup>                                           |
| Z                                 | 4                                                                                | 8                                                                   |
| Calculated density                | 1.638 mg/m <sup>3</sup>                                                          | 1.208 mg/m <sup>3</sup>                                             |
| F(000)                            | 1184                                                                             | 3680                                                                |
| Linear absorption coefficient μ   | 4.554 mm <sup>-1</sup>                                                           | 1.532 mm <sup>-1</sup>                                              |
| Max. and min. transmission        | 1.000 and 0.736                                                                  | 1.000 and 0.790                                                     |
| Unit cell determination           | 2.47° < θ < 35.70°                                                               | 2.40° < θ < 21.32°                                                  |
|                                   | 9905 reflections used at 100K                                                    | 9890 reflections used at 100K                                       |
| Data collection                   |                                                                                  |                                                                     |
| Temperature                       |                                                                                  | 100K                                                                |
| Diffractometer                    |                                                                                  | Bruker APEX-II CCD                                                  |
| Radiation source                  |                                                                                  | Incoatec microfocus sealed tube                                     |
| Radiation and wavelength          |                                                                                  | MoKα, 0.71073 Å                                                     |
| Monochromator                     |                                                                                  | multilayer monochromator                                            |
| Scan type                         |                                                                                  | φ and ω scans                                                       |
| θ range for data collection       | 2.01 to 35.00°                                                                   | 2.08 to 25.00°                                                      |
| Reflections collected / unique    | 38304 / 10517                                                                    | 65878 / 16976                                                       |
| Significant unique reflections    | 9146 with I > 2σ(I)                                                              | 11043 with I > 2σ(I)                                                |
| R(int), R(sigma)                  | 0.0236, 0.0233                                                                   | 0.0711, 0.0946                                                      |
| Completeness (θ)                  | 100.0 % (35.0°)                                                                  | 99.9% (25.0°)                                                       |
| Refinement                        |                                                                                  |                                                                     |
| Refinement method                 |                                                                                  | Full-matrix least-squares on F <sup>2</sup>                         |
| Data / parameters / restraints    | 10517 / 268 / 2                                                                  | 16976 / 961 / 2                                                     |
| Goodness-of-fit on F <sup>2</sup> | 1.046                                                                            | 1.014                                                               |
| Final R indices [I > 2σ(I)]       | R1 = 0.0224, wR2 = 0.0481                                                        | R1 = 0.0526, wR2 = 0.1160                                           |
| R indices (all data)              | R1 = 0.0299, wR2 = 0.0500                                                        | R1 = 0.0975, wR2 = 0.1315                                           |
| Extinction expression             | none                                                                             | none                                                                |
| Largest Δ/σ in last cycle         | 0.005                                                                            | 0.001                                                               |
| Largest difference peak and hole  | 0.656 and -0.359 e/Å <sup>3</sup>                                                | 0.662 and -0.577 e/Å <sup>3</sup>                                   |
| Structure Solution Program        |                                                                                  | SHELXS-97 <sup>2</sup>                                              |
| Structure Refinement Program      |                                                                                  | SHELXL-2014/6 <sup>3</sup>                                          |
| CCDC number                       | 1850650                                                                          | 1850651                                                             |

## References

- Li, D.; Kagan, G.; Hopson, R.; Williard, P. G. *J. Am. Chem. Soc.* **2009**, *131*, 5627.
- Sheldrick, G. M. *Acta Crystallogr., A* **2008**, *64*, 112.
- Sheldrick, G. M. *Acta Crystallogr., C Struct. Chem.* **2015**, *71*, 3.
